# High molecular weight hyaluronan – a potential adjuvant to fluid resuscitation in porcine abdominal sepsis

**Authors:** Annelie Barrueta Tenhunen<sup>1,2\*</sup>, Jaap van der Heijden<sup>2</sup>, Wojciech Weigl<sup>2</sup>, Robert Frithiof<sup>2</sup>, Paul Skorup<sup>3</sup>, Anders Larsson<sup>4</sup>, Anders Larsson<sup>1</sup>, Jyrki Tenhunen<sup>2</sup>

1. Hedenstierna Laboratory, Dept of Surgical Sciences, Uppsala University, Uppsala, Sweden
2. Dept of Surgical Sciences, Division of Anesthesiology and Intensive Care, Uppsala University, Uppsala, Sweden
3. Dept of Medical Sciences, Division of Infectious Diseases, Uppsala University, Uppsala, Sweden
4. Dept of Medical Sciences, Division of Clinical Chemistry, Uppsala University, Uppsala, Sweden

**\*Address correspondence:** Annelie Barrueta Tenhunen, Hedenstierna laboratory, Dept of Surgical Sciences, Uppsala University, 75185 Uppsala, Sweden, E-mail: [annelie.barrueta@surgsci.uu.se](mailto:annelie.barrueta@surgsci.uu.se), Phone +46186110000 Fax +46186114153

**Short title:** Hyaluronan in sepsis resuscitation

## 1 **Abstract:**

2 While fluid resuscitation is fundamental in the treatment of sepsis-induced tissue hypo-  
3 perfusion, a sustained positive fluid balance is associated with excess mortality. Crystalloids  
4 are the mainstay of fluid resuscitation and use of either synthetic colloids or albumin is  
5 controversial. Hyaluronan, an endogenous glycosaminoglycan with high affinity to water, has  
6 not been tested as adjuvant in fluid resuscitation.

7 We sought to evaluate the effects of hyaluronan as an adjuvant to fluid resuscitation in  
8 peritonitis induced sepsis. In a prospective, parallel-grouped, blinded model of porcine  
9 peritonitis-sepsis, we randomized animals to intervention with adjuvant hyaluronan (add-on to  
10 standard therapy) (n=8) or 0.9% saline (n=8). After the onset of hemodynamic instability the  
11 animals received an initial bolus of 0.1 % hyaluronan 1 mg/kg/10 min or placebo (saline)  
12 followed by a continuous infusion of 0.1% hyaluronan (1 mg/kg/h) or saline during the  
13 experiment. We hypothesized that the administration of hyaluronan would reduce the volume  
14 of fluid administered (aiming at stroke volume variation <13%) and/or attenuate the  
15 inflammatory reaction.

16 Total volumes of intravenous fluids infused were  $17.5 \pm 11$  ml/kg/h vs.  $19.0 \pm 7$  ml/kg/h in  
17 intervention and control groups, respectively ( $p = 0.442$ ). Plasma IL-6 increased to 2450 (1420  
18 – 6890) pg/ml and 3700 (1410 – 11960) pg/ml (18 hours of resuscitation) in the intervention  
19 and control groups (NS). In a post-hoc analysis, modified shock index remained lower in  
20 intervention group ( $p = 0.011 - 0.037$ ).

21 In conclusion adjuvant hyaluronan did not reduce the volume needed for fluid administration  
22 or decrease the inflammatory reaction. Adjuvant hyaluronan was, however, associated with  
23 lower modified shock index. Bearing in mind that the experiment has a limited group-size we  
24 suggest that further studies on hyaluronan in sepsis are warranted.

25

## 26 **Introduction:**

27 Sepsis is associated with cardiovascular compromise due to absolute and relative hypovolemia,  
28 vasodilation, myocardial depression [1] and derangements of the microcirculation [2-4]. While  
29 effective fluid resuscitation is essential to antagonize sepsis-induced tissue hypo-perfusion [5],  
30 the optimal approach to fluid therapy has not yet been established [6].

31 A sustained positive fluid balance is associated with higher mortality in septic patients [7-11].  
32 Crystalloids are the first-line fluids recommended for resuscitation in patients with sepsis and  
33 septic shock, whereas albumin is recommended in addition when considerable quantities of  
34 crystalloids are needed [5]. Although colloids are considered to be more effective volume  
35 expanders than crystalloids [12], other colloids than albumin are not recommended for volume  
36 resuscitation in sepsis/septic shock [13, 6].

37 Resuscitation with albumin may be associated with lower total volume administered as  
38 compared to crystalloids [14]. However, its role as a resuscitation fluid in critical illness [15] or  
39 more specifically in sepsis, is not clear [14, 16-19]. Albumin is costly, and although it is  
40 considered to be safe (as to transmission of pathogens) [20], it is a human blood product with  
41 potential side-effects and risks.

42 Hyaluronan (HA) is a polyanionic, linear glycosaminoglycan, composed of alternating  $\beta$ -d-  
43 glucuronate and N-acetyl- $\beta$ -d-glucosamine [21- 23]. Due to its large molecular size and negative  
44 charges, HA has pronounced hydrophilic and colloid osmotic properties [24-26]. The  
45 dominating forms of HA *in vivo* have molecular weights of >1000 kDa and are referred to as  
46 high molecular weight HA [27] (HMW-HA). HMW-HA is an important constituent of the  
47 endothelial glycocalyx layer [27] and is paramount in the maintenance of vascular integrity [28-  
48 29].

49 Inflammation leads to shedding of HA from the vascular endothelial layer [30]. The degradation  
50 of HMW-HA is mediated by hyaluronidases [31], as well as by reactive oxygen [32] and  
51 nitrogen species [33]. While intact HMW-HA exhibits anti-inflammatory properties [34],  
52 degraded, or low molecular weight HA (LMW-HA), has a pro-inflammatory effect [35-36].  
53 HA in plasma has a high turnover rate with a half-life of two to five minutes and is removed  
54 primarily by the liver [21]. Elevated levels of plasma HA correlates with more severe disease  
55 in critical illness, but studies have rendered conflicting results regarding a possible association  
56 with mortality [37-40].

57 Pretreatment with systemically administered HMW-HA in a rat model of sepsis and mechanical  
58 ventilation did not improve macrocirculation, but reduced the inflammatory response in the  
59 lung as well as the degree of lung injury [41]. Intravenous administration of HA in humans did  
60 not result in any serious adverse events [22]. To the best of our knowledge, systemically  
61 administered HMW-HA has not been studied in a context of peritonitis induced sepsis in larger  
62 animals or in humans.

63 We developed, to the best of our understanding, a clinically relevant intensive care, fecal  
64 peritonitis/sepsis model in order to test the hypothesis that the administration of HMW-HA  
65 would reduce the volume of fluid administered during resuscitation and/or attenuate the hyper-  
66 inflammatory state associated with peritonitis induced sepsis.

67

68

## 69 **Materials and methods**

### 70 **Animals and ethic statements**

71 The study (protocol: [dx.doi.org/10.17504/protocols.io.bwt5peq6](https://dx.doi.org/10.17504/protocols.io.bwt5peq6)) was approved by the Animal  
72 Ethics Committee in Uppsala, Sweden (decision 5.8.18-01054/2017, DOUU 2019-014). The  
73 care of the animals was carried out in strict accordance with the National Institute of Health  
74 guide for the care and use of Laboratory animals (NIH publications No 8023, revised 1978) and  
75 all efforts were made to minimize suffering. After premedication and induction of anesthesia,  
76 all the animals received continuous intravenous analgesia and were under deep anesthesia. No  
77 animal was awake during any moment of the experiment. The study was performed at the  
78 Hedenstierna Laboratory, Uppsala University, Sweden.

79

### 80 **Anesthesia and instrumentation**

81 Sixteen pigs (*Sus scrofa domesticus*) of mixed Swedish, Hampshire and Yorkshire breeds of  
82 both sexes (mean weight  $29.4 \pm 1.4$  kg) were premedicated with Zoletil Forte<sup>®</sup> (tiletamine and  
83 zolazepam) 6 mg/kg and Rompun<sup>®</sup> (xylazine) 2.2 mg/kg i.m. After adequate sedation was  
84 established we placed the animals in a supine position and introduced a peripheral intravenous  
85 catheter in an ear vein. Following a bolus of fentanyl of 5-10  $\mu\text{g}/\text{kg}$  i.v., anesthesia was  
86 maintained with ketamine 30 mg/kg/h, midazolam 0.1-0.4 mg/kg/h and fentanyl 4  $\mu\text{g}/\text{kg}/\text{h}$ , in  
87 glucose 2.5% during the whole experiment. After adequate depth of anesthesia was assured by  
88 absence of reaction to pain stimulus between the front hooves, rocuronium 2.5 mg/kg/h was  
89 added as muscle relaxant. Ringer's acetate was infused i.v. at a rate of 30 ml/kg/h during the  
90 first hour and thereafter tapered down to 10 ml/kg/h until the induction of peritonitis.

91 The animals were under deep anesthesia during the whole experiment (up to 18 hours of sepsis  
92 after onset of circulatory instability), including euthanasia. Bolus doses of 100 mg ketamine i.v.  
93 were administered if signs of distress or reaction to pain stimulus were noted. In case an animal  
94 presented with refractory shock it was euthanized just prior to circulatory collapse (rapidly  
95 decreasing systemic arterial pressure, bradycardia and a decrease in end tidal CO<sub>2</sub>).

96 The animals were tracheostomized and a tube with an internal diameter of eight mm  
97 (Mallinckrodt Medical, Athlone, Ireland) was inserted in the trachea and connected to a  
98 ventilator (Servo I, Maquet, Solna, Sweden). Thereafter, volume controlled ventilation was  
99 maintained as follows: tidal volume (V<sub>T</sub>) 8 ml/kg, respiratory rate (RR) 25/min,  
100 inspiratory/expiratory time (I:E) 1:2, inspired oxygen concentration (F<sub>I</sub>O<sub>2</sub>) 0.3 and positive end-  
101 expiratory pressure (PEEP) 8 cmH<sub>2</sub>O. The settings of V<sub>T</sub>, I:E and PEEP were maintained  
102 constant throughout the protocol. Respiratory rate was adjusted aiming at a PaCO<sub>2</sub> <6.5 kPa,  
103 while F<sub>I</sub>O<sub>2</sub> was adjusted to keep PaO<sub>2</sub> >10 kPa.

104 A triple lumen central venous catheter for fluid infusions and a pulmonary artery catheter  
105 (Edwards Life-Science, Irvine CA, USA) for measurement of pulmonary artery pressures and  
106 cardiac output (CO) were inserted via the right jugular vein. An arterial catheter for blood  
107 pressure measurement and blood sampling was inserted via the right carotid artery. A PiCCO  
108 (pulse contour cardiac output) catheter (Pulsion, Munich, Germany) was inserted via the right  
109 femoral artery for estimation of stroke volume variation (SVV). Blood gas analyses were  
110 performed immediately after sampling and executed on an ABL 3 analyzer (Radiometer,  
111 Copenhagen, Denmark). Hemoglobin (hgb) and hemoglobin oxygen saturation were analyzed  
112 with a hemoximeter OSM 3 (Radiometer, Copenhagen, Denmark) calibrated for porcine  
113 hemoglobin.

114 We performed a midline laparotomy and catheterized the bladder for urinary drainage. Transit-  
115 time flow probe (3 mm, Transonic Systems, Ithaca, New York, USA) was applied around the  
116 renal artery. The flow probe was connected to a dual channel flow-meter (T 402, Transonic  
117 System Inc, New York, USA) and renal blood flow was recorded continuously. After  
118 identification of the caecum a small incision was made, feces was collected and the incision  
119 closed. After insertion of a large-bore intra-peritoneal drain, the abdominal incision was closed.

120

## 121 **Study protocol and protocolized resuscitation**

### 122 **Preparation of HMW-HA solution**

123 Five grams of HMW-HA 1560 kDa (Sodium hyaluronate Lot# 027362 HA15M-5, Lifecore  
124 Biomedical LCC, Chaska, MN, USA) was dissolved in 500 ml 0.9% saline to yield a stock  
125 concentration of 1% (10 mg/ml). The solution of 1% HMW-HA 1560 kDa was produced under  
126 sterile condition in laminar air-flow, and stored as 50 ml aliquots at  $-20^{\circ}\text{C}$  prior to use. On the  
127 day of experiment aliquots were thawed and the stock solution was diluted 1:10 in 0.9% saline,  
128 to yield 0.1% concentration.

### 129 **Pilot study - kinetics and safety profile of HMW-HA injection**

130 A pilot study was performed prior to the experimental peritonitis model to study simplified  
131 plasma kinetics and safety of intravenous HA injection. Animals were injected with HA (HA  
132 group, n=3) or 0.9% saline (control group, n=2). Each individual animal in the HA group  
133 received a total of six consecutive injections with the 0.1% HMW-HA solution aiming to  
134 achieve plasma concentrations of 1000, 5000, 10000, 30000, 50000 and 100000 ng/ml by  
135 injecting 0.065, 0.325, 0.65, 1.95, 3.25 and 6.5 ml/kg respectively. The control group received  
136 six injections with equal amounts of 0.9% saline. Blood samples (EDTA) for HA analyses were

137 taken at 3 and 45 minutes after each injection and vital parameters were recorded at T=0  
138 (baseline), 5, 10, 15, 25, 35 and 45 minutes.

139

140 The experimental time line for the main series is presented in Fig. 1. Baseline measurements  
141 were performed after a period of at least 30 min of stabilization following preparation.  
142 Peritonitis was established with a peritoneal instillation of autologous feces (2 g/kg body weight  
143 in 200 ml warmed 5% glucose solution), after which the large-bore intraperitoneal drain was  
144 removed and the abdominal wall closed. The infusion of Ringer's Acetate was discontinued at  
145 the time of the induction of fecal peritonitis.

146 **Fig 1. Experimental Time Line.** Preparation was followed by at least 30 minutes of  
147 stabilization. Thereafter peritonitis was induced. Intervention and resuscitation was initiated at  
148 the onset of circulatory instability (S0). S6, S12 and S18 refer to consecutive time points,  
149 respectively (hours after S0).

150 In order to simulate an intensive care setting, the respiratory, circulatory and metabolic  
151 maintenance treatments followed a predefined protocol to support vital parameters according  
152 to typical invasive monitoring and repeated measurements and sampling. Both intervention and  
153 control groups were subject to a protocolized resuscitation that was initiated at onset of  
154 circulatory instability (S0) with Ringer's Acetate 10 ml/kg/h. The resuscitation protocol was  
155 equal to both groups and aimed at MAP > 60 mmHg, guiding fluid and norepinephrine  
156 administration by changes in SVV and MAP respectively. If MAP < 60 mmHg and SVV > 15  
157 % fluid was administered, in case of hypotension without increased SVV, infusion of  
158 norepinephrine 5 ml/h (40 µg/ml) was started following a bolus of 1 ml (40 µg/ml), and  
159 increased stepwise. The fluid therapy consisted of boluses of Ringer's Acetate of 150 ml,  
160 repeated until SVV was steady < 15 %. If MAP was stable > 60 mmHg, infusion was first



161 tapered down to 5 ml/kg/h, and if the animal continued to be stable and SVV maintained < 13%  
162 the infusion was stopped [42].

163

## 164 **Experimental design**

165 This was a prospective, parallel-grouped, blinded study with animals randomized (block  
166 randomization, sealed opaque envelope) after peritonitis induction into two treatment groups:  
167 intervention with HMW-HA (n=8) or control group (n=8). The researchers were blinded for the  
168 group allocation until a master file for the whole experiment was produced. After the onset of  
169 hemodynamic instability (MAP <60 mmHg for >five min) the intervention group received an  
170 initial bolus of 0.1 % HMW-HA solution of 1 mg/kg over ten minutes. The initial bolus was  
171 followed by a continuous infusion of the same concentration of 1 mg/kg/h during the rest of the  
172 experiment, aiming at a plasma hyaluronan concentration at 10000 - 15000 ng/ml. The control  
173 group received the same volume of vehicle (0.9% saline) both as initial bolus and continuous  
174 infusion. Immediately after the intervention was initiated, a protocolized resuscitation was  
175 started together with Piperacillin/Tazobactam 2 gram in 10 ml of 0.9% saline, given i.v. every  
176 6 hours.

177

## 178 **Analyses and physiologic parameters**

179 We analyzed arterial blood gases at baseline, at the onset of circulatory instability and every  
180 hour for the following eighteen hours duration of the experiment. At the same time points,  
181 hemodynamic parameters (systemic arterial and pulmonary arterial pressures, CO, heart rate),  
182 respiratory parameters ( $F_{I}O_2$ ,  $SaO_2$ ,  $ETCO_2$ , static peak pressure, dynamic and static

183 compliance) and urine output were measured. We calculated modified shock index based on  
184 MAP [43,44] and also combined the calculation with hgb and norepinephrine dose.  
185 Every three hours mixed venous blood gas analyses was performed, while plasma and urinary  
186 samples were collected for analysis every six hours. Stroke volume variation (SVV) was  
187 monitored continuously in order to guide fluid resuscitation.

188

## 189 **Cytokine and HA analyses**

190 Porcine-specific sandwich ELISAs were used for the determination of TNF-a, interleukin-6  
191 (IL-6), interleukin-8 (IL-8) and interleukin-10 (IL-10) in plasma (DY690B (TNF-a), DY686  
192 (IL-6), DY535 (IL-8) and DY693B (IL-10), R&D Systems, Minneapolis, MN, USA). The  
193 ELISAs had total coefficient of variations (CV) of approximately 6%. Hyaluronan  
194 concentration was measured with a commercial ELISA kit (Hyaluronan DuoSet, DY3614,  
195 R&D Systems, Minneapolis, MN, USA).

196

## 197 **Tissue analyses post mortem**

198 At the end of the experiment the animals were euthanized with 100 mmol KCl i.v. under deep  
199 anesthesia, the skin of the animals was washed with soap, dried with paper and sprayed with  
200 ethanol, thereafter the chest wall and abdomen were opened. Tissue samples were collected  
201 from left lung (dorsal/basal), heart (left ventricle), liver, spleen, kidney and small intestine. The  
202 samples were immersed in 10% buffered formalin immediately. A veterinary pathologist who  
203 was blinded for the group allocation evaluated the samples histologically, and inflammatory  
204 lesions were graded in a semi-quantitative way: 4, very severe (numerous leukocytes in most  
205 parts of the section), 3, severe: (numerous leukocytes in many parts of the section), 2, moderate

206 (moderate numbers of leukocytes diffusely or focally distributed), 1, mild (low number of  
207 leukocytes diffusely or focally distributed or 0, lesions were not observed.

208 Wet-to-dry ratio was measured in samples from the above mentioned locations. Samples were  
209 weighed, and dried in an oven, at 50° C, until the weight did not differ between two consecutive  
210 measurements.

211

## 212 **Bacterial investigations**

213 Every third hour 0.5 mL arterial blood was collected from a sterile arterial catheter for  
214 quantitative blood cultures. Therefrom a 100 µl was cultured on three separate cysteine lactose  
215 electrolyte deficient (CLED) agar plates, then cultured at 37°C overnight and colony forming  
216 units (CFU) quantified with viable count technique the following day. CFU on only one CLED  
217 plate from a time point was interpreted as a contamination otherwise the median of counted  
218 CFU/mL was calculated. More than 1 CFU/mL were considered a positive blood culture.  
219 Colonies were sent to specification to a MALDI Biotyper (tof-user@FLEX-PC).

220 Samples from lung, spleen and liver were also collected for tissue culture after spraying the  
221 organ (surface) with 99% ethanol. App. 1 gram of each tissue was placed in a sterile mortar and  
222 mashed in 3 mL saline 0.9%, from where 200 µl was cultured on CLED plates and quantified  
223 as described above.

224

## 225 **Statistical analysis**

226 To determine sample size we used data from a previous peritonitis protocol where the fluid  
227 balance of the control group had a standard deviation of  $\pm 4$  ml/kg/h. Aiming at detecting a  
228 difference of 6 ml/kg/h between groups in fluid balance, a power of 0.8 and a significance level

229 of  $< 0.05$  yielded a sample size of eight animals in each group. We tested data for normality by  
230 applying the Shapiro-Wilk's test.

231 To describe each group separately from baseline to onset of circulatory instability (S0) we used  
232 the Student's t-test, whereas the one-way ANOVA was used to describe the groups separately  
233 throughout the experiment. The two-tailed Student's t-test, the Mann-Whitney U test and the  
234 two-way ANOVA were used to compare the two groups, pending distribution of data. Multiple  
235 imputation was used in order to replace missing data due to early deaths.

236 The data are expressed as mean  $\pm$  SD or median (IQR) as appropriate. We conducted the  
237 statistical analyses using SPSS v. 27.0.0 software (SPSS, Inc., Chicago, IL, USA). A *p*-value  
238 of  $< 0.05$  was considered to be statistically significant. Bonferroni correction was not used.

239 The results are presented as  $n = 8$  per group at the baseline, at the onset of circulatory instability  
240 (S0), at six (S6) and twelve (S12) hours after onset of circulatory instability, as well as at the  
241 end (last observation, prior to imminent death or at 18 hours (S18)). Hourly recordings of  
242 hemodynamic and respiratory parameters, as well as blood gas analyses are presented in the  
243 electronic supplement (Additional files 1-16). Comparison between the groups over time are  
244 presented herein (two-way ANOVA) after performing multiple imputation (i.e. 5) of which *p*-  
245 values are reported as an interval.

246

## 247 **Results**

### 248 **Pilot study - kinetics and safety profile of HA**

249 The actual measured increase in plasma hyaluronan concentrations followed every injection  
250 was 73% (SD  $\pm$  13.5%) of the aimed concentration (Supplemental file 17). Hyaluronan removal  
251 rate was concentration dependent until the last injection (Supplemental file 18). Plasma

252 hyaluronan concentrations did not return to baseline levels within 45 minutes, resulting in an  
253 accumulation effect on the total hyaluronan concentration. The pharmacokinetics of plasma  
254 hyaluronan followed a non-linear pattern (Table 1). No adverse effects were observed for either  
255 circulatory and respiratory parameters or blood gas analysis. No changes were found for HR,  
256 MAP, CO or systemic vascular resistance (SVRI) at any hyaluronan concentration between the  
257 hyaluronan and control group (Supplemental file 20). Sub-analysis of HR, MAP, CO over time  
258 did not show any consistent changes for any hyaluronan concentration (Supplemental file 21  
259 a-d and 22 a - d).

260 **Table 1. Aim vs measured hyaluronan concentration increase after injection.**

| Injection hyaluronan (mg/kg) | Aim [hyaluronan] (ng/ml) | $\Delta$ hyaluronan increase (ng/ml) |
|------------------------------|--------------------------|--------------------------------------|
| 0.065                        | 1000                     | 570 $\pm$ 135                        |
| 0.325                        | 5000                     | 3219 $\pm$ 3102                      |
| 0.65                         | 10000                    | 7175 $\pm$ 2412                      |
| 1.95                         | 30000                    | 21367 $\pm$ 2782                     |
| 3.25                         | 50000                    | 48067 $\pm$ 18845                    |
| 6.5                          | 100000                   | 79151 $\pm$ 8836                     |

261 Netto increase of hyaluronan concentration after each injection with hyaluronan. Values as mean  $\pm$  SD.

262 In the main series fourteen out of the sixteen animals survived the experiment until euthanasia  
263 (18 hours after onset of circulatory instability), while one animal died of refractory shock during  
264 the 18-hours observation period in both treatment (T = S8) and control groups (T = S14).

265

## 266 **Hyaluronan concentration**

267 Plasma hyaluronan concentrations were comparable in the two groups at baseline and at onset  
268 of circulatory instability. Plasma hyaluronan concentration (median) increased to 12275, 9060  
269 and 9760 ng/ml during infusion at 6, 12 and 18 hours of the experiment with broad variation.  
270 Peritonitis/sepsis *per se* was associated with 3-fold increase of hyaluronan at 18 hours in the  
271 control group (Fig 2).

272 **Figure 2. Hyaluronan concentrations.** Hyaluronan concentrations in intervention and control  
 273 groups at baseline, onset of circulatory instability (S0), six (S6), twelve (S12) and eighteen  
 274 hours (S18) after onset of circulatory instability.

275

## 276 Hemodynamics

277 The intervention group presented with circulatory instability (defined as MAP < 60 mmHg >  
 278 five minutes) within  $3.8 \pm 1.3$  h and the control group within  $3.8 \pm 1.6$  h ( $p = 0.966$ ) from the  
 279 induction of peritonitis.

280 The onset of circulatory instability was accompanied by an increase in HR, MPAP, SVV, hgb  
 281 and temperature in both intervention and control groups (Tables 2 and 3).

282 **Table 2. Hemodynamic parameters.**

|                 | Group      | Baseline<br>(n=8+8) | S0<br>(n=8+8)  | S6<br>(n=8+8) | S12<br>(n=7+8) | S18<br>(n=7+7) | <i>p</i> range                 |
|-----------------|------------|---------------------|----------------|---------------|----------------|----------------|--------------------------------|
| MAP<br>(mmHg)   | Hyaluronan | 87 ± 13             | 55 ± 3         | 63 ± 8        | 67 ± 5         | 68 ± 6         | <i>p</i> =<br>0.059 –<br>0.187 |
|                 | Control    | 69 ± 7              | 57 ± 1         | 65 ± 3        | 63 ± 4         | 63 ± 9         |                                |
| HR<br>(BPM)     | Hyaluronan | 84 ± 15             | 141 ± 44*      | 130 ± 28      | 116 ± 26       | 118 ± 29       | <i>p</i> =<br>0.961 –<br>0.988 |
|                 | Control    | 83 ± 19             | 160 ± 34*      | 149 ± 13      | 136 ± 27       | 127 ± 19       |                                |
| MPAP<br>(mmHg)  | Hyaluronan | 16 ± 2              | 19 ± 3*        | 22 ± 7        | 20 ± 3         | 22 ± 3         | <i>p</i> =<br>0.632 –<br>0.788 |
|                 | Control    | 17 ± 1              | 20 ± 4*        | 21 ± 3        | 24 ± 4         | 23 ± 5         |                                |
| Wedge<br>(mmHg) | Hyaluronan | 9 ± 2               | 7 ± 1          | 9 ± 2         | 9 ± 2          | 9 ± 2          | <i>p</i> =<br>0.936            |
|                 | Control    | 8 ± 2               | 6 ± 1          | 8 ± 1         | 9 ± 2          | 10 ± 3         |                                |
| SVV (%)         | Hyaluronan | 10 ± 5              | 15 ± 3*        | 15 ± 3        | 11 ± 2         | 12 ± 4         | <i>p</i> =<br>0.448 –<br>0.701 |
|                 | Control    | 7 ± 2               | 17 ± 5*        | 18 ± 5        | 15 ± 4         | 16 ± 4         |                                |
| CO<br>(l/min)   | Hyaluronan | 3.1 ± 0.8           | 2.5 ± 0.7      | 3.1 ± 0.8     | 2.9 ± 0.7      | 2.9 ± 0.7      | <i>p</i> =<br>0.722 –<br>0.916 |
|                 | Control    | 3.0 ± 0.8           | 2.1 ± 0.4      | 3.2 ± 0.5     | 3.2 ± 0.5      | 3.6 ± 1.2      |                                |
| CVP<br>(mmHg)   | Hyaluronan | 8 ± 3               | 7 ± 3          | 9 ± 3         | 9 ± 4          | 10 ± 5         | <i>p</i> =<br>1.000            |
|                 | Control    | 7 ± 2               | 8 ± 4          | 8 ± 2         | 10 ± 3         | 11 ± 4         |                                |
| T (°C)          | Hyaluronan | 39.0 ± 0.9          | 40.5 ±<br>1.0* | 40.4 ± 0.6    | 40.3 ± 0.7     | 40.0 ± 0.7     | <i>p</i> =<br>1.000            |
|                 | Control    | 38.2 ± 0.8          | 39.9 ±<br>0.8* | 39.8 ± 0.6    | 39.9 ± 0.5     | 39.6 ± 0.7     |                                |

283 Values reported as mean ± SD. Significance level as range after performing multiple imputation (*p* range). \* Baseline vs S0,

284  $p < 0.05$ , *p*-value from paired t-test.

285 **Table 3. Arterial blood gas analysis**

|                                        | Group      | BL<br>(n = 8+8) | S0<br>(n = 8+8) | S6<br>(n = 8+8) | S12<br>(n = 7+8) | S18<br>(n = 7+7) | p range              |
|----------------------------------------|------------|-----------------|-----------------|-----------------|------------------|------------------|----------------------|
| pH                                     | Hyaluronan | 7.45 ± 0.05     | 7.36 ± 0.07     | 7.38 ± 0.07     | 7.38 ± 0.08      | 7.36 ± 0.12      | p = 0.931<br>- 0.990 |
|                                        | Control    | 7.44 ± 0.02     | 7.35 ± 0.04     | 7.37 ± 0.05     | 7.35 ± 0.10      | 7.26 ± 0.17      |                      |
| Hgb (g/l)                              | Hyaluronan | 96 ± 7          | 135 ± 14*       | 114 ± 9         | 112 ± 6          | 111 ± 6          | p = 0.389<br>- 0.527 |
|                                        | Control    | 93 ± 6          | 139 ± 12*       | 122 ± 6         | 113 ± 7          | 107 ± 4          |                      |
| Lactate (mmol/l)                       | Hyaluronan | 2.6 ± 0.8       | 3.4 ± 1.1*      | 2.2 ± 1.8       | 1.3 ± 0.4        | 1.3 ± 0.6        | p = 0.254<br>- 0.500 |
|                                        | Control    | 2.2 ± 0.5       | 2.5 ± 0.6       | 2.0 ± 0.5       | 2.1 ± 1.4        | 2.4 ± 2.8        |                      |
| BE (mmol/l)                            | Hyaluronan | 3.1 ± 3.2       | - 0.2 ± 4.1     | - 0.7 ± 3.2     | - 0.9 ± 4.3      | - 1.5 ± 6.2      | p = 0.953<br>- 0.992 |
|                                        | Control    | 3.9 ± 1.7       | - 0.1 ± 2.5     | - 0.4 ± 2.8     | - 2.7 ± 3.9      | - 5.1 ± 8.9      |                      |
| HCO <sub>3</sub> <sup>-</sup> (mmol/l) | Hyaluronan | 27.3 ± 2.9      | 24.0 ± 3.6      | 23.7 ± 2.9      | 23.7 ± 3.7       | 23.2 ± 5.2       | p = 0.955<br>- 0.987 |
|                                        | Control    | 27.9 ± 1.5      | 23.9 ± 2.1      | 23.9 ± 2.5      | 22.2 ± 3.6       | 20.1 ± 7.2       |                      |
| Na (mmol/l)                            | Hyaluronan | 135 ± 2         | 131 ± 3         | 129 ± 3         | 126 ± 2          | 125 ± 3          | p = 0.985<br>- 0.999 |
|                                        | Control    | 135 ± 1         | 131 ± 2         | 129 ± 2         | 126 ± 1          | 125 ± 2          |                      |
| K (mmol/l)                             | Hyaluronan | 3.9 ± 0.3       | 4.9 ± 0.8       | 5.5 ± 0.6       | 5.2 ± 0.5        | 5.0 ± 0.8        | p = 0.878<br>- 0.980 |
|                                        | Control    | 3.8 ± 0.4       | 5.0 ± 0.7       | 5.5 ± 0.5       | 5.6 ± 0.4        | 5.5 ± 0.9        |                      |

286 Values reported as mean ± SD. Significance level as range after performing multiple imputation (p range). \* Baseline vs S0,  
287 p < 0.05, p-value from paired t-test.

288 Lactate increased in intervention group during the same period, but not in the control group  
289 (Table 3).

290 All hemodynamic parameters as well as arterial blood lactate changed comparably in the two  
291 groups as a function of time over the length of the resuscitation period (Tables 2 and 3). Neither  
292 did the groups differ in regard to wedge pressure, nor CVP as a function of time (Tables 2 and  
293 3).

294 Modified shock index (HR/MAP) (Fig 3a) and shock index with hgb or with hgb and  
295 norepinephrine effects (HR\* hgb/MAP and HR\*hgb\*NE/MAP) (Figs 3b - 3c) were comparable  
296 at baseline and at the onset of circulatory instability in the two groups. Hyaluronan infusion  
297 was associated with lower shock indexes as compared to placebo (Figs 3a - 3c).

298 **Figures 3a-c. Modified shock indexes.** Shock indexes calculated as HR/MAP (3a),  
299 HR\*hgb/MAP (3b) and HR\*hgb\*NE/MAP (3c).

300

301 **Respiratory parameters:**

302 Onset of circulatory instability was accompanied by comparable decrease of SaO<sub>2</sub> and P/F ratio  
 303 from baseline in the two groups. There was a gradual decrease in both dynamic and static  
 304 compliance in both intervention and control groups respectively, throughout the protocol (Table  
 305 4). As RR was adjusted (intervention group: range 25 – 50/min) (control group: range 25 –  
 306 40/min) in order to maintain normocapnia we observed that PEEP<sub>TOT</sub> was stable at 8 cm H<sub>2</sub>O  
 307 in the both groups throughout the experiment. A progressive increase in static peak pressure  
 308 throughout the protocol was statistically significant in the control group ( $p = 0.001 – 0.004$ ) but  
 309 not in the intervention group ( $p = 0.350 – 0.594$ ) throughout the resuscitation period.

310 **Table 4. Respiratory parameters.**

|                                                  | Group      | Baseline<br>(n=8+8) | S0<br>(n=8+8) | S6<br>(n=8+8) | S12<br>(n=7+8) | S18<br>(n=7+7) | <i>p</i><br>range   |
|--------------------------------------------------|------------|---------------------|---------------|---------------|----------------|----------------|---------------------|
| P/F ratio                                        | Hyaluronan | 57 ± 4              | 47 ± 8*       | 44 ± 12       | 45 ± 6         | 40 ± 8         | <i>p</i> =<br>0.540 |
|                                                  | Control    | 59 ± 4              | 50 ± 4*       | 48 ± 6        | 40 ± 13        | 35 ± 14        | –<br>0.822          |
| Compliance<br>dynamic<br>(ml/cmH <sub>2</sub> O) | Hyaluronan | 22 ± 4              | 21 ± 3        | 16 ± 5        | 15 ± 3         | 12 ± 3**       | <i>p</i> =<br>0.908 |
|                                                  | Control    | 24 ± 4              | 23 ± 3        | 19 ± 5        | 14 ± 6         | 13 ± 5**       | –<br>(0.975)        |
| Compliance<br>static<br>(ml/cmH <sub>2</sub> O)  | Hyaluronan | 25 ± 5              | 23 ± 4        | 19 ± 6        | 17 ± 4         | 14 ± 3**       | <i>p</i> =<br>0.951 |
|                                                  | Control    | 28 ± 5              | 26 ± 3        | 21 ± 5        | 16 ± 6         | 15 ± 5**       | –<br>0.992          |
| Peak P static<br>(cmH <sub>2</sub> O)            | Hyaluronan | 19 ± 4              | 20 ± 2        | 24 ± 7        | 25 ± 4         | 26 ± 5         | <i>p</i> =<br>0.942 |
|                                                  | Control    | 18 ± 2              | 19 ± 1        | 22 ± 4        | 28 ± 10        | 29 ± 11        | –<br>1.000          |
| PEEP <sub>TOT</sub><br>(cmH <sub>2</sub> O)      | Hyaluronan | 8 ± 0               | 8 ± 0         | 8 ± 0         | 8 ± 0          | 8 ± 0          | <i>p</i> =<br>0.847 |
|                                                  | Control    | 8 ± 0               | 8 ± 0         | 8 ± 0         | 8 ± 0          | 8 ± 2          | –<br>0.965          |
| PaCO <sub>2</sub><br>(kPa)                       | Hyaluronan | 5.3 ± 0.5           | 5.9 ± 0.5     | 5.5 ± 0.6     | 5.5 ± 0.4      | 5.5 ± 0.4      | <i>p</i> =<br>0.584 |
|                                                  | Control    | 5.5 ± 0.3           | 6.2 ± 0.6     | 5.7 ± 0.3     | 5.8 ± 0.3      | 6.0 ± 0.2      | –<br>0.972          |
| SaO <sub>2</sub> (%)                             | Hyaluronan | 96 ± 1              | 93 ± 3*       | 91 ± 8        | 94 ± 1         | 93 ± 3         | <i>p</i> =<br>0.236 |
|                                                  | Control    | 96 ± 0              | 94 ± 1*       | 94 ± 2        | 92 ± 4         | 88 ± 10        | –<br>0.597          |

311 Values reported as mean ± SD. Significance level as range after performing multiple imputation (*p* range). \* Baseline vs S0,  
 312  $p < 0.05$ , *p* - value from paired t-test. \*\* Dynamics described within each group respectively,  $p < 0.05$ , *p* - value from one-  
 313 way ANOVA.  
 314

315



## 316 **Fluid balance, norepinephrine dosage, kidney function and** 317 **electrolytes**

318 Total volumes of fluid administered during the experiment were  $17.5 \pm 11$  ml/kg/h vs.  $19.0 \pm 7$   
319 ml/kg/h in intervention and control groups, respectively ( $p = 0.442$ ). Weight gain was  $12.5 \pm$   
320  $3.1$  kg in the intervention and  $14.0 \pm 2.3$  kg in the control group ( $p = 0.328$ ). The average  
321 norepinephrine dosage was  $1.2 \pm 1.6$   $\mu\text{g}/\text{kg}/\text{min}$  and  $1.0 \pm 0.8$   $\mu\text{g}/\text{kg}/\text{min}$  in the intervention and  
322 the control groups, respectively ( $p = 0.721$ ) (Additional file 23).

323 Urine production decreased from baseline to onset of circulatory instability from  $4.1 \pm 4$   
324 ml/kg/h to  $0.5 \pm 0.4$  ml/kg/h ( $p = 0.045$ ) and from  $3.0 \pm 2$  ml/kg/h to  $0.5 \pm 0.4$  ml/kg/h ( $p =$   
325  $0.015$ ) in the intervention and control groups, respectively. Hourly diuresis was comparable in  
326 the two groups throughout the resuscitation period, in average  $2.1 \pm 1.3$  ml/kg/hour in the  
327 intervention and  $1.7 \pm 0.9$  ml/kg/hour in the control group ( $p = 0.442$ ) (Additional file 25).

328 Renal arterial blood flow decreased from baseline to onset of circulatory instability in both  
329 intervention and control group: from  $132 \pm 79$  ml to  $61 \pm 46$  ml ( $p = 0.001$ ) vs. from  $138 \pm 63$   
330 ml to  $72 \pm 34$  ml ( $p = 0.002$ ). Blood flow changed comparably in the two groups as a function  
331 of time ( $p = 0.873 - 0.976$ ) throughout the protocol (Additional file 26).

332 Plasma creatinine increased from baseline  $77 \pm 17$   $\mu\text{mol}/\text{l}$  to  $100 \pm 19$   $\mu\text{mol}/\text{l}$  at onset of  
333 circulatory instability in intervention group and from  $72 \pm 12$   $\mu\text{mol}/\text{l}$  to  $92 \pm 14$   $\mu\text{mol}/\text{l}$  in control  
334 group, with comparably increasing plasma concentrations throughout the resuscitation period  
335 in both groups respectively as a function of time. Creatinine clearance is depicted in additional  
336 file 27. Plasma urea, whole blood Na, whole blood K, BE and  $\text{HCO}_3^-$  followed a similar pattern  
337 over time in the two groups (Tables 3 and 5).

338 **Table 5. Creatinine and urea in plasma and urine markers.**

|                             | Group             | Baseline<br>(n=8+8) | S0<br>(n=8+8)  | S6<br>(n=8+8) | S12<br>(n=7+8) | S18<br>(n=7+7)    | p-value     |
|-----------------------------|-------------------|---------------------|----------------|---------------|----------------|-------------------|-------------|
| <b>Creatinine in plasma</b> | <b>Hyaluronan</b> | $77 \pm 17$         | $100 \pm 19^*$ | $111 \pm 18$  | $122 \pm 28$   | $145 \pm 61^{**}$ | $p = 0.980$ |

| ( $\mu\text{mol/l}$ )                        |                   |               |              |              |              |                |             |
|----------------------------------------------|-------------------|---------------|--------------|--------------|--------------|----------------|-------------|
|                                              | <b>Control</b>    | 72 $\pm$ 12   | 92 $\pm$ 14* | 100 $\pm$ 17 | 123 $\pm$ 23 | 138 $\pm$ 36** |             |
| <b>Urea in plasma (mmol/l)</b>               | <b>Hyaluronan</b> | 4 $\pm$ 1     | 5 $\pm$ 1    | 5 $\pm$ 1    | 5 $\pm$ 1    | 5 $\pm$ 1      | $p = 0.951$ |
|                                              | <b>Control</b>    | 4 $\pm$ 1     | 5 $\pm$ 1    | 5 $\pm$ 1    | 5 $\pm$ 1    | 5 $\pm$ 1      |             |
| <b>U Krea (<math>\mu\text{mol/l}</math>)</b> | <b>Hyaluronan</b> | 10 $\pm$ 4    | 13 $\pm$ 3   | 7 $\pm$ 4    | 8 $\pm$ 4    | 8 $\pm$ 4      | $p = 0.826$ |
|                                              | <b>Control</b>    | 8 $\pm$ 5     | 14 $\pm$ 4   | 7 $\pm$ 3    | 9 $\pm$ 4    | 7 $\pm$ 4      |             |
| <b>U Urea (mmol/l)</b>                       | <b>Hyaluronan</b> | 270 $\pm$ 120 | 280 $\pm$ 70 | 150 $\pm$ 80 | 160 $\pm$ 60 | 150 $\pm$ 80   | $p = 0.294$ |
|                                              | <b>Control</b>    | 290 $\pm$ 150 | 370 $\pm$ 80 | 150 $\pm$ 50 | 140 $\pm$ 50 | 110 $\pm$ 50   |             |
| <b>U K (mmol/l)</b>                          | <b>Hyaluronan</b> | 100 $\pm$ 50  | 70 $\pm$ 60  | 40 $\pm$ 10  | 60 $\pm$ 20  | 40 $\pm$ 20    | $p = 0.490$ |
|                                              | <b>Control</b>    | 70 $\pm$ 50   | 60 $\pm$ 50  | 70 $\pm$ 30  | 60 $\pm$ 20  | 40 $\pm$ 20    |             |
| <b>U Na (mmol/l)</b>                         | <b>Hyaluronan</b> | 70 $\pm$ 50   | 40 $\pm$ 20  | 60 $\pm$ 20  | 40 $\pm$ 10  | 40 $\pm$ 20    | $p = 0.735$ |
|                                              | <b>Control</b>    | 60 $\pm$ 10   | <20†         | 40 $\pm$ 20  | 40 $\pm$ 20  | 30 $\pm$ 0     |             |

339

340 †S-Na: S0 <20 in all animals in control group. Values reported as mean  $\pm$  SD. Significance level as range after performing  
 341 multiple imputation ( $p$  range). \* Baseline vs S0,  $p < 0.05$ ,  $p$  - value from paired t-test. \*\* Dynamics described within each  
 342 group respectively,  $p < 0.05$ ,  $p$  - value from one-way ANOVA.

343

344 Finally, there were no differences between groups in urine creatinine, urea, sodium, or  
 345 potassium concentrations between groups as a function of time (Table 5).

346

## 347 Cytokines

348 The concentration of IL-6, IL-8, IL-10 and TNF- $\alpha$  in plasma increased from baseline to onset  
 349 of circulatory instability (S0) in both intervention and control groups. The dynamics in cytokine  
 350 concentrations in plasma were comparable in the two groups throughout the experiment (Table  
 351 6).

352 **Table 6. Cytokines in plasma**

| Cytokine                               | Group             | Baseline (n=8+8) | S0 (n=8+8)          | S6 (n=8+8)         | S12 (n=8+8)        | S18 (n=7+8)         | $p$ range           |
|----------------------------------------|-------------------|------------------|---------------------|--------------------|--------------------|---------------------|---------------------|
| <b>IL-6 (pg/ml)</b>                    | <b>Hyaluronan</b> | 150 (-10 – 470)  | 5650 (3070 – 6540)* | 4030 (2670 – 6570) | 4000 (1730 – 8380) | 2450 (1420 – 6890)  | $p = 0.614 - 0.859$ |
|                                        | <b>Control</b>    | 270 (130 – 460)  | 5340 (3460 – 6870)* | 3700 (2050 – 6950) | 3910 (2300 – 8330) | 3700 (1410 – 11960) |                     |
| <b>TNF-<math>\alpha</math> (pg/ml)</b> | <b>Hyaluronan</b> | 150 (100 – 310)  | 240 (140 – 420) *   | 170 (90 – 320)     | 160 (130 – 190)    | 160 (140 – 250)     | $p = 0.932 - 0.957$ |
|                                        | <b>Control</b>    | 170 (90 – 380)   | 230 (140 – 390)*    | 140 (100 – 250)    | 160 (120 – 230)    | 150 (110 – 240)     |                     |

|                      |                   |                 |                   |                  |                  |                 |               |
|----------------------|-------------------|-----------------|-------------------|------------------|------------------|-----------------|---------------|
| <b>IL-10 (pg/ml)</b> | <b>Hyaluronan</b> | 240 (-20 – 760) | 820 (450 – 1350)* | 860 (690 – 1480) | 660 (430 – 1140) | 500 (360 – 770) | $p = 0.748 -$ |
|                      | <b>Control</b>    | 330 (220 – 570) | 610 (490 – 820)*  | 720 (570 – 1180) | 600 (540 – 910)  | 540 (380 – 790) | 0.796         |
| <b>IL-8 (pg/ml)</b>  | <b>Hyaluronan</b> | 60 (50 – 80)    | 130 (90 – 150)*   | 120 (80 – 190)   | 90 (50 – 190)    | 80 (40 – 170)   | $p = 0.694 -$ |
|                      | <b>Control</b>    | 60 (50 – 90)    | 110 (80 – 150)*   | 110 (70 – 130)   | 80 (60 – 110)    | 60 (40 – 130)   | 0.741         |

353  
354  
355  
356  
357  
358

One animal died before finishing the protocol in both groups, last sample before imminent death is included in the analyses of the time point after death, that is S12 for the animal that died in group 1 (204 at S8), and S18 for the animal that died in group 2 (207 at S14), before finishing the protocol. Values as median (95% CI). \* Baseline vs S0,  $p < 0.05$ ,  $p$  - value from paired t-test.

## 359 **Wet-to-dry ratio**

360 Wet-to-dry ratios at the end of the experiment were comparable in the two groups (Additional  
361 file 28).

362

## 363 **Blood and tissue cultures**

### 364 **Blood cultures**

365 All animals, except one in the intervention group, had positive blood cultures at some time point  
366 during the experiment (Additional file 29). Number of CFU/ml ( $p = 0.682$ ) were comparable in  
367 the two groups throughout the experiment. Positive cultures were of mixed etiology, with a  
368 dominance (> 90%) of E. coli.

369

### 370 **Tissue cultures**

371 All animals had viable bacteria in at least one organ (lung, liver, spleen). All three tissue  
372 cultures had viable bacteria in five animals in intervention group and in four animals in the  
373 control group. The two groups did not differ in CFU/g in either of the tested organs.

374 Cultures of lung tissue had viable bacteria in five animals in intervention group (median: 50,  
375 IQR 475) and in six animals in the control group (median 2: 200, IQR 4400) ( $p = 0.382$ ). Liver  
376 tissue cultures had viable bacteria in six animals in intervention group (median: 254, IQR 405)  
377 and in five animals in control group (median: 236, IQR 1682) ( $p = 1$ ). Tissue cultures of spleen  
378 had viable bacteria in all animals in intervention group (median: 5174, IQR 15692) and in all  
379 but one animal in the control group (median: 1813, IQR 8107) ( $p = 0.195$ ).

380

## 381 **Histology**

382 Lung samples showed acute inflammatory lesions in samples from four animals of the  
383 intervention group and seven animals of the control group, the lesions varied in intensity  
384 between individual animals. Lung lesions were comparable in intervention (median 1, IQR 2)  
385 and control groups (median 2, IQR 2) ( $p = 0.234$ ) (Figs 4a and 4b).

386 **Figures 4a and 4b. Lung histology.** Lung histology, representative samples of lung lesions  
387 from one animal in intervention and control groups, respectively (please note the different  
388 magnification).

389 No significant lesions were visualized in heart tissue in either group. All but one animal in each  
390 group had acute focal/multifocal degeneration in the liver and coagulative necrosis of  
391 hepatocytes. Liver lesions were comparable between groups: intervention group (median 3,  
392 IQR 2) and control groups (median 1, IQR 1) ( $p = 0.065$ ). In intestinal samples, the epithelial  
393 lining was generally preserved, but the gut mucosa in all pigs was infiltrated with mixed  
394 leucocytes to a varying degree. There was no difference between intervention (median 2, IQR  
395 1) and control groups (median 2, IQR 2) ( $p = 0.328$ ) as to inflammatory lesions of the intestine  
396 (Figs 5a and 5b).

397 **Figures 5a and 5b. Histology of intestine.** Histology of intestine, representative samples of  
398 intestinal lesions from one animal in intervention and control groups, respectively (please note  
399 the different magnification).

400 Lesions in kidney samples were rare (intervention: median 0, IQR 1, control group: median 0,  
401 IQR 1) and equally distributed between groups ( $p = 0.959$ ). Three animals in the intervention  
402 group (median 0, IQR 3) and three animals in the control group (median 0, IQR 3) exhibited  
403 inflammatory lesions of the spleen, manifested as acute purulent inflammation of the splenic  
404 capsule. The capsular inflammation generally extended to the parenchyma in subcapsular areas.  
405 There was no difference between groups ( $p = 1.000$ ) regarding inflammatory lesions of the  
406 spleen.

407

## 408 **Discussion**

409 The main finding of the present study was that, contrary to our hypothesis, high molecular  
410 weight hyaluronan infusion did not decrease the total volume of fluid resuscitation in the early  
411 phase of peritonitis-induced sepsis. Weight gain, urine production, tissue wet-to-dry ratios and  
412 histology in the intervention and control groups were comparable. Furthermore, plasma  
413 cytokine concentrations were comparable over the length of the experiment. In the post hoc  
414 analyses, on the other hand, modified shock index with and without the additional combined  
415 effect of hemoglobin suggested that HMW-HA in the present model was associated with less  
416 hemodynamic instability.

417 We used a porcine model of fecal peritonitis to mimic sepsis and septic shock in patients. All  
418 the animals presented with circulatory instability after a period of untreated peritonitis and some  
419 developed shock/refractory shock, although the disease severity was not as pronounced as  
420 previously described by us. The heterogeneous nature of the model is consistent with the sepsis  
421 panorama seen in patients, where a similar infectious stimulus results in resolving infection in  
422 some individuals while others develop a severe shock state with hyperlactatemia and resistance

423 to resuscitation. Tissue and blood cultures as well as the dynamics in plasma concentrations of  
424 the measured cytokines (IL-6, IL-8, IL-10 and TNF- $\alpha$ ) were all consistent with a severe  
425 infection and the systemic inflammation as seen in sepsis [45].

426 In the present study isolated hemodynamic parameters (HR, MAP, SVV, CO, mixed venous  
427 saturation or lactate), body weight gain (kg before vs. after the experiment), wet-to-dry ratio  
428 and fluid balance did not differ between groups, suggesting that systemically administered  
429 HMW-HA do not exert any volume sparing effects in sepsis resuscitation. However, previously  
430 described shock indexes may predict morbidity and mortality better than isolated hemodynamic  
431 parameters [46,47], including the modified shock index[43,44]. In the current study neither HR  
432 nor MAP differed between groups, however a post hoc analysis of modified shock index  
433 (HR/MAP) revealed a statistically significant difference between groups at several time points  
434 with a less pronounced hemodynamic instability in the intervention group, this held true also  
435 when including hemoglobin and norepinephrine dosage in the calculation.

436 The discussion about the optimal fluid for volume resuscitation in sepsis and septic shock  
437 continues [6]. While fluid administration is indispensable in the resuscitation phase of sepsis  
438 and early fluid administration is associated with a better outcome [5], fluid overload is  
439 associated with increased mortality [7-11]. Intravenous colloids oppose the transcapillary fluid  
440 flux [48] and are more effective volume expanders than crystalloids [12]. However this  
441 advantage in sparing volume of total fluid administered during resuscitation is not associated  
442 with better outcome in critical illness [14].

443 HA is a molecule with pronounced hydrophilic properties that plays a significant role in the  
444 regulation of water homeostasis and is present in all tissues and body fluids [21]. It is an  
445 important contributor to colloid osmotic pressure in, for instance, synovial fluid [24]. Solutions  
446 of HA has highly non-ideal characteristics regarding colloid osmotic pressure, implying a

447 rapidly increasing colloid osmotic pressure with increasing concentration [49], with the colloid  
448 osmotic pressure of HA exceeding that of albumin at a concentration of 1 mg/ml respectively  
449 [50]. The colloid osmotic pressure of solutions containing mixtures of HA and albumin exceed  
450 the sum of the colloid osmotic pressures of each solution separately, at equal concentrations  
451 [51].

452 In the kinetics and safety pre-study, HMW-HA was administered intravenously in healthy pigs  
453 without any observed negative effects during the experiment. The measured hyaluronan  
454 concentration in plasma was in average  $73 \pm 13.5\%$  of the aimed concentration, approximating  
455 blood volume in the pig to be 65 ml/kg. From these data we calculated that a plasma  
456 concentration of 15 000 ng/ml would be achieved with an initial bolus of 1 mg/kg followed by  
457 an infusion of 1mg/kg/h. Doses as high as 1.5 - 12 mg/kg have been administered without any  
458 serious adverse events in healthy humans [22].

459 Plasma concentrations of HA were comparable in the intervention and control groups at  
460 baseline and at onset of circulatory instability. Peritonitis/sepsis was associated with 3-fold  
461 increase of hyaluronan in the control group during the resuscitation period. The intervention  
462 group showed a greater increase of plasma HA due to the infusion of exogenous hyaluronan,  
463 and values were considerably higher in the intervention group than values previously reported  
464 in sepsis [38,39,29,40]. Since this was associated with less hemodynamic instability (modified  
465 shock indexes) our findings may support the notion that HA exerts a protective effect in critical  
466 illness, as suggested previously [39].

467 Neither the histological analysis, bacterial cultures or the cytokine response in plasma revealed  
468 a difference in inflammation between the two groups, suggesting that HA administered in  
469 sepsis, after onset of circulatory instability, does not counteract the state of hyper-inflammation  
470 associated with the early phase of peritonitis induced sepsis. HMW-HA is anti-inflammatory

471 and immunosuppressive [34]. It reduces the pro-inflammatory cytokine response in plasma  
472 [52], promotes resolution of infection [53] and potentially renders antibodies a higher  
473 neutralizing capacity through steric exclusion [21]. Fractions of HA, or low molecular weight  
474 HA (250 kDa), on the other hand, is a strong signal of tissue damage [54] and induces a pro-  
475 inflammatory response through several pathways [35,52,36] with production of pro-  
476 inflammatory cytokines and enhanced secretion of nitric oxide [53]. The present study does not  
477 support the previous notion that HMW-HA has anti-inflammatory effects.

478 Our study has several limitations. Most importantly it is an animal model which implies  
479 possible species differences in host response, both in regard to infectious insult and to  
480 intervention, as compared to humans. It is also a study of limited size and small differences  
481 between groups might not have been detected, even more so since the peritonitis model used  
482 presents with a heterogeneous panorama of disease severity. Furthermore peritoneal lavage was  
483 not performed for source control. Several pigs had positive blood cultures already at baseline,  
484 a finding most likely explained by the fact that baseline measurements were performed after  
485 laparotomy, “pre-baseline” blood cultures immediately at arrival should be considered for  
486 future protocols. There are also open questions about optimal concentration, timing [55] and  
487 mode of administration of a HA solution. Administration of rapid crystalloid infusions increases  
488 plasma concentration of HA and might disrupt the glycocalyx [56]. Thus, the fact that we started  
489 an infusion of HMW-HA at onset of circulatory instability alongside with resuscitation with  
490 crystalloid (infusion and boluses as needed) might have interfered with the intervention.  
491 Limiting fluid resuscitation in the intervention group to nothing but HMW-HA solutions could  
492 be an alternative approach to study the potential benefit of HMW-HA solutions in sepsis  
493 resuscitation.

494



## 495 **Conclusions**

496 In conclusion, the current study does not support the hypothesis that HMW-HA reduces the  
497 volume of fluid administered during resuscitation and/or attenuate the hyper-inflammatory state  
498 associated with peritonitis induced sepsis. However, a post-hoc analysis of modified shock  
499 index showed that systemically administered HMW-HA is associated with a less pronounced  
500 hemodynamic instability as to controls. This finding, albeit implied with the potential  
501 drawbacks of post-hoc analyses *per se*, suggests that a beneficial role of HMW-HA in the  
502 context of sepsis resuscitation is possible.

503

## 504 **References:**

- 505 1. Marik PE and Varon J. The hemodynamic derangements in sepsis. Implications for treatment.  
506 *Chest* 1998; **114**: 854-860.
- 507 2. Ellis CG, Bateman RM, Sharpe MD, Sibbald WJ and Gill R. Effect of a maldistribution of  
508 microvascular bloodflow on capillary O<sub>2</sub> extraction in sepsis. *Am J Physiol Heart Circ Physiol*  
509 2002; **282**: H156-H164.
- 510 3. Goldman D, Bateman RM and Ellis CG. Effect of decreased O<sub>2</sub> supply on skeletal muscle  
511 oxygenation and O<sub>2</sub> consumption during sepsis: role of heterogeneous capillary spacing and  
512 blood flow. *Am J Physiol Heart Circ Physiol* 2006; **290**: H2277-H2285.
- 513 4. De Backer D, Donadello K, Taccone FS, Ospina-Tascon G, Diamantino Salgado D and  
514 Vincent JL. Microcirculatory alterations: potential mechanisms and implications for therapy.  
515 *Ann Intensive Care* 2011; **1**: 27.

- 516 5. Rhodes A, Evans LE, Alhazzani W et al. Surviving Sepsis Campaign: International  
517 Guidelines for Management of Sepsis and Septic Shock: 2016. *Intens Care Med* 2017; **43**: 304-  
518 377.
- 519 6. Tseng CH, Chen TT, Wu MY, Chan MC, Shih MC and Tu YK. Resuscitation fluid types in  
520 sepsis, surgical, and trauma patients: a systematic review and sequential network meta-  
521 analyses. *Crit Care* 2020; **24**: 693.
- 522 7. Boyd JH, Forbes J, Nakada TA, Walley KR and Russell JA. Fluid resuscitation in septic  
523 shock: a positive fluid balance and elevated central venous pressure are associated with  
524 increased mortality. *Crit Care Med* 2011; **39** (2): 259–65.
- 525 8. Acheampong A and Vincent JL. A positive fluid balance is an independent prognostic factor  
526 in patients with sepsis. *Crit Care* 2015; **19**: 251.
- 527 9. De Oliveira FSV, Freitas FGR, Ferreira EM, Castro I, Bafi AT, Azevedo LCP et al. Positive  
528 fluid balance as a prognostic factor for mortality and acute kidney injury in severe sepsis and  
529 septic shock. *J Crit Care* 2015; **30**: 97–101
- 530 10. Brotfain E, Koyfman L, Toledano R, Borer A, Fucs L, Galante O et al. Positive fluid balance  
531 as a major predictor of clinical outcome of patients with sepsis/septic shock after ICU discharge.  
532 *Am J Emerg Med* 2016; **34**: 2122–2126
- 533 11. Neyra JA, Li X, Canepa-Escaro F, Adams-Huet B, Toto RD, Yee J et al. Cumulative Fluid  
534 Balance and Mortality in Septic Patients With or Without Acute Kidney Injury and Chronic  
535 Kidney Disease. *Crit Care Med* 2016; **44** (10): 1891–900.
- 536 12. Margaron MP and Soni NC. Changes in serum albumin concentration and volume  
537 expanding effects following a bolus of albumin 20% in septic patients. *Br J Anaesth* 2004; **92**  
538 (6): 821 – 826.
- 539 13. Brown RM and Semler MW. Fluid Management in Sepsis. *J Intensive Care Med* 2019; **34**  
540 (5): 364–373.

- 541 14. Finfer S, Bellomo R, Boyce N, French J, Myburgh J and Norton R. A comparison of  
542 albumin and saline for fluid resuscitation in the intensive care unit. The SAFE study  
543 investigators. *N Engl J Med* 2004; **350**: 2247 – 2256.
- 544 15. Roberts I. Human albumin administration in critically ill patients: systematic review of  
545 randomised controlled trials. *Brit Med J* 1998; **317**: 235–40.
- 546 16. Delaney AP, Dan A, McCaffrey J and Finfer S. The role of albumin as a resuscitation fluid  
547 for patients with sepsis: A systematic review and meta-analysis. *Crit Care Med* 2011; **39**  
548 (2): 386-391
- 549 17. Caironi P, Tognoni G, Masson S, Fumagalli R, Pesenti A, Romero M et al. Albumin  
550 replacement in patients with severe sepsis or septic shock. *N Engl J Med* 2014; **370**: 1412–21.
- 551 18. Jiang L, Jiang S, Zhang M, Zheng Z and Ma Y. Albumin versus Other Fluids for Fluid  
552 Resuscitation in Patients with Sepsis: A Meta-Analysis. *Plos One* 2014; **9** (12): 1-21
- 553 19. Xu JY, Chen QH, Xie JF, Pan C, Liu SQ, Huang LW et al. Comparison of the effects of  
554 albumin and crystalloid on mortality in adult patients with severe sepsis and septic shock: a  
555 meta-analysis of randomized clinical trials. *Crit Care* 2014; **18**: 702
- 556 20. Vincent JL, Wilkes MM and Navickis RJ. Safety of human albumin – serious adverse events  
557 reported worldwide in 1998 – 2000. *Br J Anaesth* 2003; **91** (5): 625 – 30.
- 558 21. Fraser JRE, Laurent TC and Laurent UBG. Hyaluronan: its nature, distribution, functions  
559 and turnover. *J Int Med* 1997; **242**: 27–33
- 560 22. Hamilton SR, Veisoh M, Tölg C, Tirona R, Richardson J, Brown R et al. Pharmacokinetics  
561 and Pharmacodynamics of Hyaluronan Infused into Healthy Human Volunteers. *Open Drug*  
562 *Metabol J* 2009; **3**: 43-55
- 563 23. Cowman MK, Lee HG, Schwertfeger KL, McCarthy JB and Turley EA. The content and  
564 size of hyaluronan in biological fluids and tissues. *Front Immunol* 2015; **6**: 261.

- 565 24. Jensen CE and Zachariæ L. The contributions from hyaluronic acid and from protein to the  
566 colloid osmotic pressure of human synovial fluid. *Acta Rheumatol Scand* 1959; **5**: 18 – 28
- 567 25. Maytin EV. Hyaluronan: More than just a wrinkle filler. *Glycobiology* 2016; **26** (6): 553–  
568 559.
- 569 26. Garantziotis S and Savani RC. Hyaluronan biology: A complex balancing act of structure,  
570 function, location and context. *Matrix Biol* 2019; **78-79**: 1–10.
- 571 27. Lennon FE and Singleton PA. Hyaluronan regulation of vascular integrity. *Am J Cardiovasc*  
572 *Dis* 2011; **1** (3): 200-213
- 573 28. Henry CBS and Duling BR. Permeation of the luminal capillary glycocalyx is determined  
574 by hyaluronan. *Am J Physiol Heart Circ Physiol* 1999; **277**: H508 – H514.
- 575 29. Sallisalmi M, Tenhunen J, Kultti A, Tammi M and Pettilä V. Plasma hyaluronan and  
576 hemorheology in patients with septic shock: A clinical and experimental study. *Clin Hemorheol*  
577 *Micro* 2014; **56**: 133–144.
- 578 30. Nieuwdorp M, Meuwese MC, Mooij HL, van Lieshout MHP, Haydena A, Leviet M et al.  
579 Tumor necrosis factor- $\alpha$  inhibition protects against endotoxin-induced endothelial glycocalyx  
580 perturbation. *Atherosclerosis* 2009; **202**: 296–303
- 581 31. Jiang D, Liang J and Noble PW. Hyaluronan as an Immune Regulator in Human Diseases.  
582 *Physiol Rev* 2011; **91**: 221–264.
- 583 32. Moseley R, Waddington RJ and Embery G. Degradation of glycosaminoglycans by reactive  
584 oxygen species derived from stimulated polymorphonuclear leukocytes. *Biochim Biophys Acta*  
585 1997; **1362**: 221–231
- 586 33. Li M, Rosenfeld L, Vilar RE and Cowman MK. Degradation of Hyaluronan by  
587 Peroxynitrite. *Archiv Biochem Biophys* 1997; **341** (2): 245–250.

- 588 34. Rivas F, Zahid OK, Reesink HL, Peal BT, Nixon AJ, DeAngelis PL et al. Label-free  
589 analysis of physiological hyaluronan size distribution with a solid-state nanopore sensor. *Nat*  
590 *Commun* 2018; **9**: 1037
- 591 35. McKee CM, Penno MB, Cowman M, Burdick MD, Strieter RM, Bao C et al. Hyaluronan  
592 (HA) Fragments Induce Chemokine Gene Expression in Alveolar Macrophages. The Role of  
593 HA Size and CD44. *J Clin Invest* 1996; **98** (10): 2403–2413
- 594 36. Black KE, Collins SL, Hagan RS, Hamblin MJ, Chan-Li Y, Hallowell RW et al. Hyaluronan  
595 fragments induce IFN $\beta$  via a novel TLR4-TRIF-TBK1-IRF3-dependent pathway. *J Inflamm*  
596 2013; **10**: 23.
- 597 37. Berg S, Brodin B, Hesselvik FJ, Laurent TC and Maller R. Elevated levels of plasma  
598 hyaluronan in septicaemia. *Scand J Clin Lab Inv* 1988; **48** (8): 727-732.
- 599 38. Berg S, Jansson I, Hesselvik FJ, Laurent TC, Lennquist S and Walther S. Hyaluronan:  
600 Relationship to hemodynamics and survival in porcine injury and sepsis. *Crit Care Med* 1992;  
601 **20** (9): 1315-1321
- 602 39. Yagmur E, Koch A, Haumann M, Kramann R, Trautwein C and Tacke F. Hyaluronan serum  
603 concentrations are elevated in critically ill patients and associated with disease severity. *Clin*  
604 *Biochem* 2012; **45**: 82–87
- 605 40. Anand D, Ray S, Srivastava LM and Bhargava S. Evolution of serum hyaluronan and  
606 syndecan levels in prognosis of sepsis patients. *Clin Biochem* 2016; **49**: 768–776.
- 607 41. Liu YY, Lee CH, Dedaj R, Zhao H, Mrabat H, Sheidlin A et al. High-molecular-weight  
608 hyaluronan – a possible new treatment for sepsis-induced lung injury: a preclinical study in  
609 mechanically ventilated rats. *Crit Care* 2008; **12** (4).
- 610 42. Tenhunen A, van der Heijden J, Blokhin I, Massaro F, Hansson HA, Feinstein R et al. The  
611 antiseptory peptide AF-16 may modulate tissue edema but not inflammation in experimental  
612 peritonitis induced sepsis. *Plos One* 2020; **15** (8).

- 613 43. Jayaprakash N, Gajic O, Frank RD and Smischney N. Elevated modified shock index in  
614 early sepsis is associated with myocardial dysfunction and mortality. *J Crit Care* 2018; **43**: 30–  
615 35
- 616 44. Sotello D, Yang S and Nugent K. Comparison of the shock index, modified shock index,  
617 and age shock index in adult admissions to a tertiary hospital. *Southwest Respiratory and*  
618 *Critical Care Chronicles* 2019; **7**(28): 18 -23.
- 619 45. Pinsky MR, Vincent JL, Deviere J, Alegre M, Kahn RJ and Dupont E. Serum Cytokine  
620 Levels in Human Septic Shock. Relation to Multiple-System Organ Failure and Mortality.  
621 *Chest* 1993; **103**(2): 565-575
- 622 46. Buffington CW, Sivarajan M and Bashein G. The quotient of mean arterial pressure and  
623 heart rate predicts hypoperfusion of collateral-dependent myocardium. *Journal of*  
624 *Cardiothoracic Anesthesia* 1989; **3**(1): 65-69
- 625 47. Ospina-Tascón GA, Teboul JL, Hernandez G, Alvarez I, Sánchez-Ortiz AI, Calderón-Tapia  
626 LE et al. Diastolic shock index and clinical outcomes in patients with septic shock. *Ann*  
627 *Intensive Care* 2020; **10**: 41
- 628 48. Woodcock TE and Woodcock TM. Revised Starling equation and the glycocalyx model of  
629 transvascular fluid exchange: an improved paradigm for prescribing intravenous fluid therapy.  
630 *Br J Anaesth* 2012; **108** (3): 384–94.
- 631 49. Bothner H and Wik O. Rheology of Hyaluronate. *Acta Oto-Laryngol* 1987; **104** (s442): 25-  
632 30
- 633 50. Comper WD and Laurent TC. Physiological Function of Connective Tissue  
634 Polysaccharides. *Physiol rev* 1978; **58** (1): 255-315
- 635 51. Laurent TC and Ogston AG. The Interaction between Polysaccharides and other  
636 Macromolecules 4. The osmotic pressure of mixtures of serum albumin and hyaluronic acid.  
637 *Biochem J* 1963; **89**: 249 – 253

- 638 52. Nakamura K, Yokohama S, Yoneda M, Okamoto S, Tamaki Y, Ito T et al. High, but not  
639 low, molecular weight hyaluronan prevents T-cell- mediated liver injury by reducing  
640 proinflammatory cytokines in mice. *J Gastroenterol* 2004; **39**: 346–354
- 641 53. Rayahin JE, Buhrman JS, Zhang Y, Koh TJ and Gemeinhart RA. High and low molecular  
642 weight hyaluronic acid differentially influence macrophage activation. *ACS Biomater Sci Eng*  
643 2015; **1**(7): 481–493
- 644 54. Termeer C, Benedix F, Sleeman J, Fieber C, Voith U, Ahrens T et al. Oligosaccharides of  
645 Hyaluronan Activate Dendritic Cells via Toll-like Receptor 4. *J Exp Med* 2002; **195** (1): 99 –  
646 111
- 647 55. Nadkarni PP, Kulkarni GS, Cerreta JM, Ma S and Cantor JO. Dichotomous effect of  
648 aerosolized hyaluronan in a hamster model of endotoxin-induced lung injury. *Exp Lung Res*  
649 2005; **31**: 807–818.
- 650 56. Berg S, Engman A, Hesselvik F and Laurent TC. Crystalloid infusion increases plasma  
651 hyaluronan. *Crit Care Med* 1994; **22** (10): 1563 – 1567

652

653

654

655

## 656 **Supporting information captions:**

657 **S1. Mean arterial pressure (MAP).** Hourly recordings of MAP throughout the experiment,  
658 intervention and control group.

659 **S2. Heart rate (HR) beats per minute (BPM).** Hourly recordings of HR throughout the experiment,  
660 intervention and control group.

661 **S3. Hemoglobin (hgb) g/l.** Hourly analyses of hgb throughout the experiment, intervention and control  
662 group.

663 **S4. Lactate mmol/l.** Hourly analyses of lactate throughout the experiment, intervention and control  
664 group.

665 **S5. pH.** Hourly analyses of blood pH throughout the experiment, intervention and control group.

666 **S6. Base excess (BE) mmol/l.** Hourly analyses of BE throughout the experiment, intervention and  
667 control group.

668 **S7. HCO<sub>3</sub><sup>-</sup> mmol/l.** Hourly analyses of blood HCO<sub>3</sub><sup>-</sup> throughout the experiment, intervention and control  
669 group.

670 **S8. Mixed venous SaO<sub>2</sub> %.** Analyses of mixed venous SaO<sub>2</sub> every three hours throughout the  
671 experiment, intervention and control group.

672 **S9. Mean pulmonary arterial pressure (MPAP) mmHg.** Hourly recordings of MPAP throughout the  
673 experiment, intervention and control group.

674 **S10. Stroke volume variation (SVV) %.** Hourly registrations of SVV, continuously recorded  
675 throughout the experiment, intervention and control group.

676 **S11. Cardiac output (CO) l/min.** Hourly recordings of CO throughout the experiment, intervention  
677 and control group.

678 **S12. Central venous pressure (CVP) mmHg.** Hourly recordings of CVP throughout the experiment,  
679 intervention and control group.

680 **S13. Temperature T °C.** Hourly recordings of T throughout the experiment, intervention and control  
681 group.

682 **S14. PaO<sub>2</sub> to inspired O<sub>2</sub> fraction (P/F-ratio).** Hourly recordings of P/F-ratio throughout the  
683 experiment, intervention and control group.

684 **S15. Static compliance (Cstat) ml/cmH<sub>2</sub>O.** Hourly recordings of Cstat throughout the experiment,  
685 intervention and control group.

686 **S16. Static peak pressure cmH<sub>2</sub>O.** Hourly recordings of static peak pressure throughout the  
687 experiment, intervention and control group.

688 **S17. Plasma concentration of hyaluronan ng/ml – pilot study.** Aimed hyaluronan plasma  
689 concentrations vs measured (ng/ml) after injection of 0.065, 0.325, 0.65, 1.95, 3.25 and 6.5 mg/kg  
690 respectively.



691 **S18. Hyaluronan kinetics 1.** Plasma concentration of hyaluronan, aim vs directly after bolus injection  
692 as well as after 45 minutes, hyaluronan removal from plasma in ng/ml/min, values as mean  $\pm$  SD.

693 **S19a. Hyaluronan kinetics 2.** Estimation of amount hyaluronan required to reach goal concentration  
694 of 10000 ng/ml according to blood volume of pigs (65 ml/kg) and goal concentration 15000 ng/ml.

695 **S19b. Hyaluronan kinetics 3.** Estimation of amount hyaluronan required to reach goal concentration  
696 of 10000 ng/ml according to pilot study.

697 **S20. Hemodynamic changes after injection of hyaluronan or 0.9% saline at several time points.**  
698 Changes are compared with baseline values for each individual experiment.

699 **S21 a-d. Changes in heart rate (HR) BPM, mean arterial pressure (MAP) (mmHg), cardiac output**  
700 **(CO) l/min and systemic vascular resistance index (SVRI) (dynes) compared with baseline.** Heart  
701 rate (HR), mean arterial pressure (MAP), cardiac output (CO) and systemic vascular resistance index  
702 for different hyaluronan concentrations.  $\Delta$  indicates the change in HR/MAP/CO/SVRI after injection  
703 with hyaluronan compared with the baseline value. No differences were found between the hyaluronan  
704 and control group. \* $\Delta$  HR for HA 50000 is considered as outlier.

705 **S22 a-d. Changes in heart rate (HR) BPM, mean arterial pressure (MAP) (mmHg), cardiac output**  
706 **(CO) l/min and systemic vascular resistance index (SVRI) (dynes) in % as compared to baseline.**  
707 HR, MAP, CO and SVRI for different hyaluronan concentrations.  $\Delta$  indicates the change in  
708 HR/MAP/CO/SVRI after injection with hyaluronan compared with the baseline value in %. No  
709 differences were found between the hyaluronan and control group. \* $\Delta$  HR for HA 50000 is considered  
710 as outlier

711 **S23. Norepinephrine administration  $\mu\text{g}/\text{kg}/\text{min}$ .** Administration of norepinephrine presented hourly  
712 throughout the experiment, intervention and control group.

713 **S24. Fluid administration ml/h.** Registration of fluid administration throughout the experiment,  
714 presented hourly, intervention and control group.

715 **S25. Diuresis ml/kg.** Hourly measurements of diuresis throughout the experiment, intervention and  
716 control group.

717 **S26. Flow arteria renalis % of flow at baseline.** Hourly recordings of flow arteria renalis throughout  
718 the experiment, intervention and control group.

719 **S27. Creatinine clearance ml/h.** Analyses of creatinine clearance every six hours throughout the  
720 experiment, intervention and control group.

721 **S28. Wet-to-dry ratio.**

722 **S29. Blood cultures.** CFU/ml. Data presented as Median (IQR).

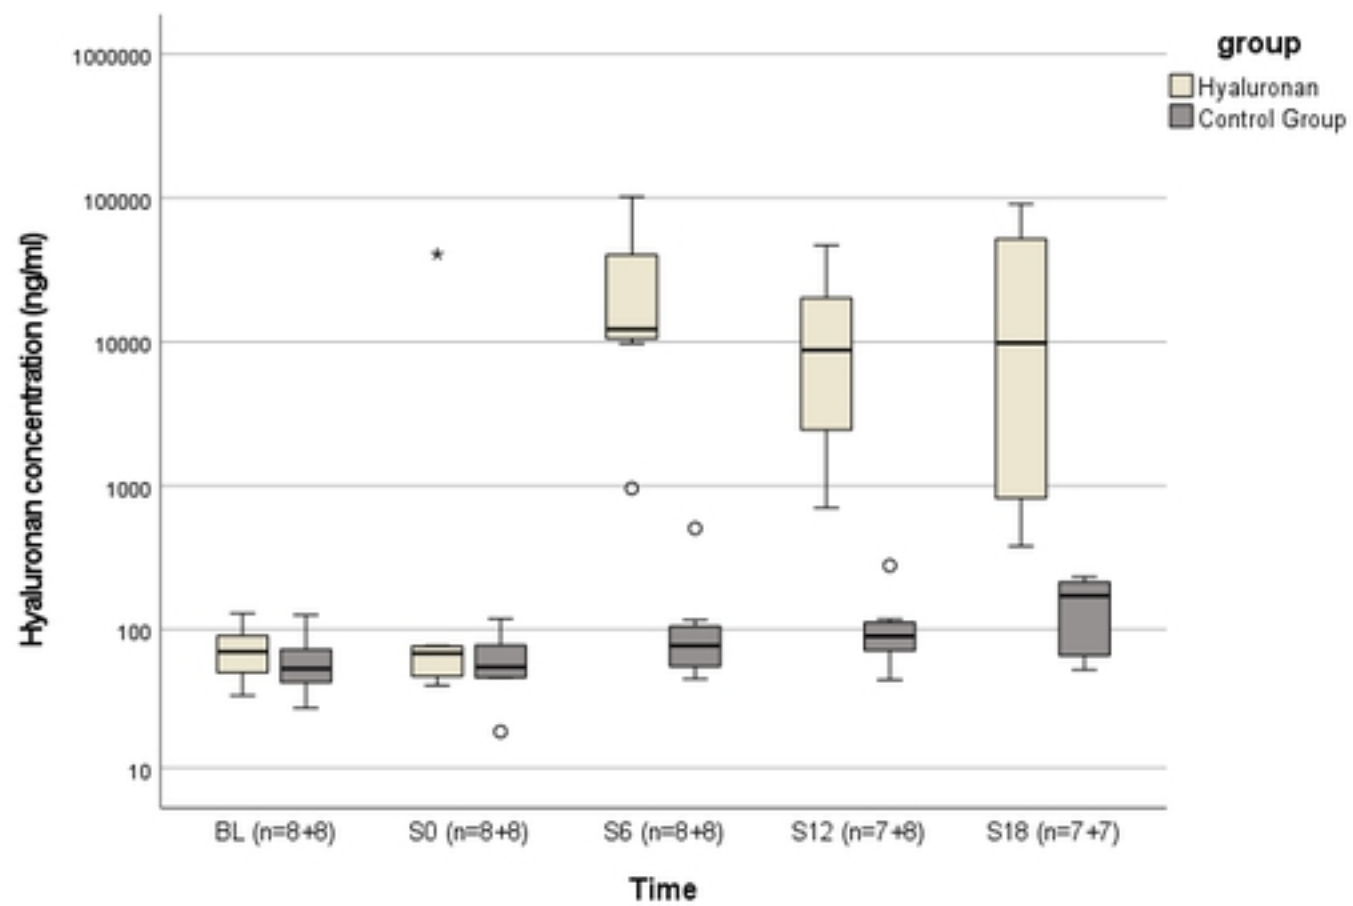

Figure 2

Figure

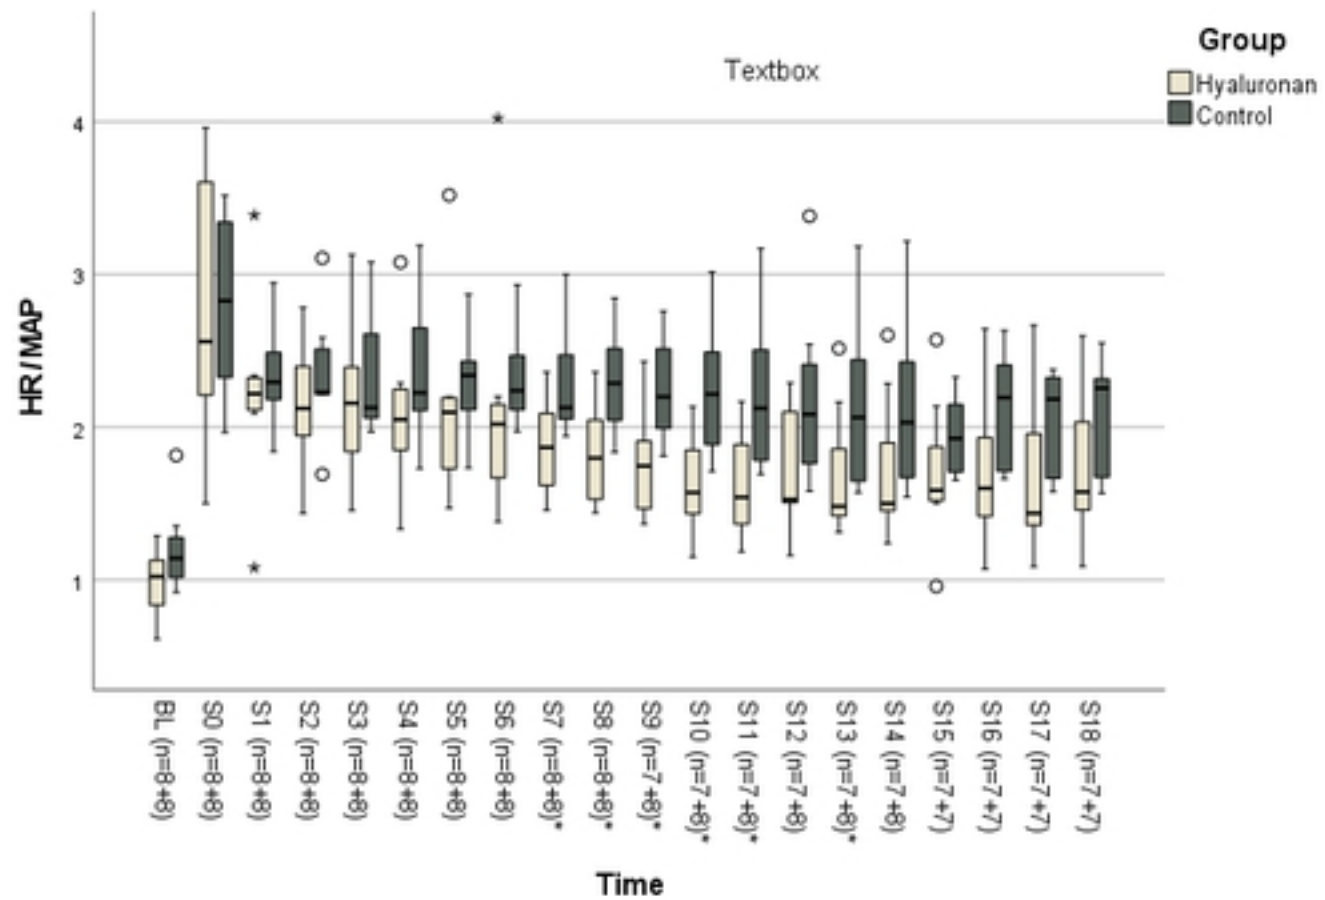

\* p= 0.05 (0.036, 0.021, 0.028, 0.011, 0.037 and 0.037)

Figure 3a

Figure

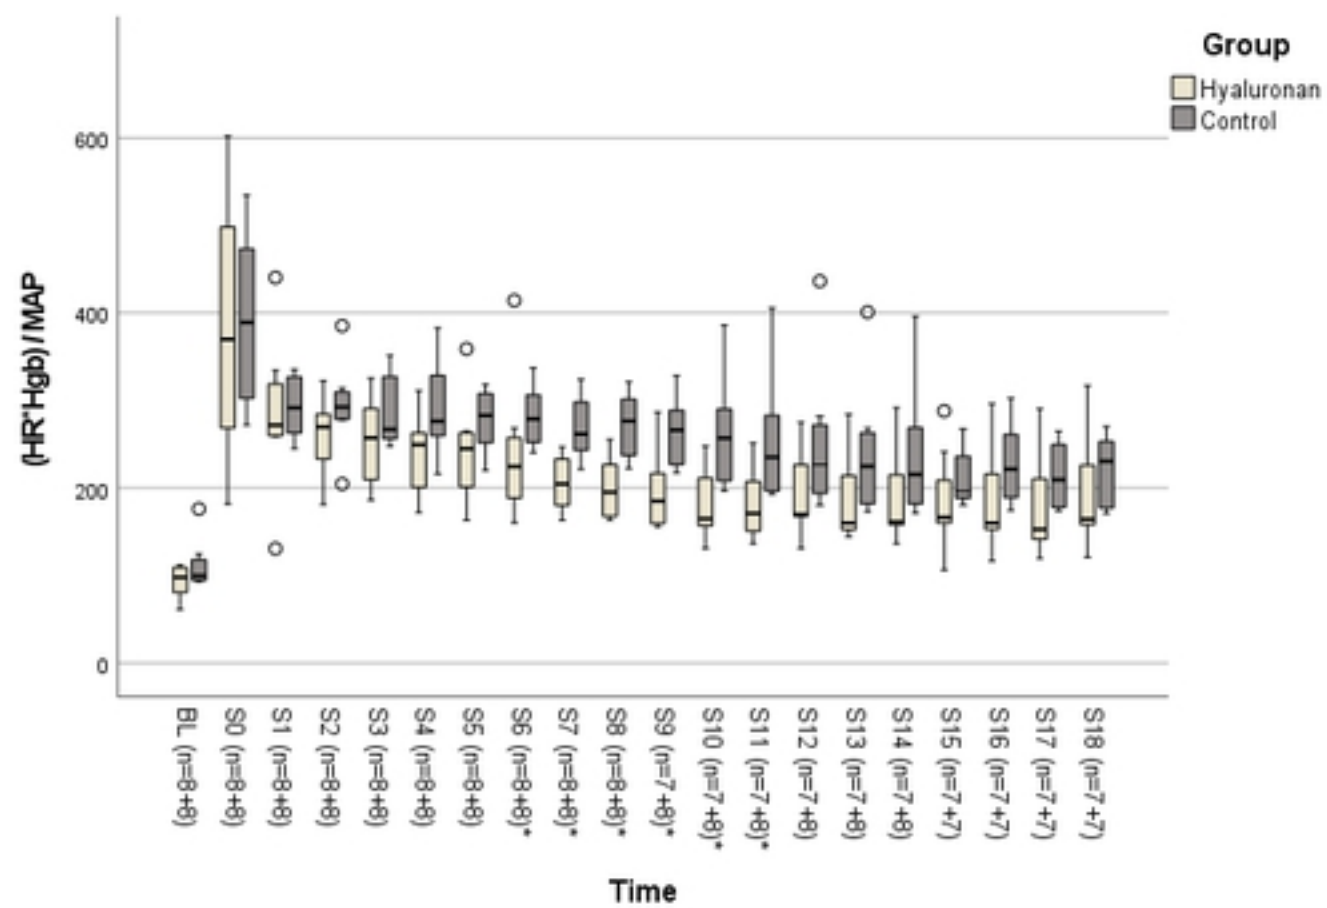

\* p < 0.05 (0.046, 0.006, 0.005, 0.028, 0.011, 0.021)

Figure 3b

Figure

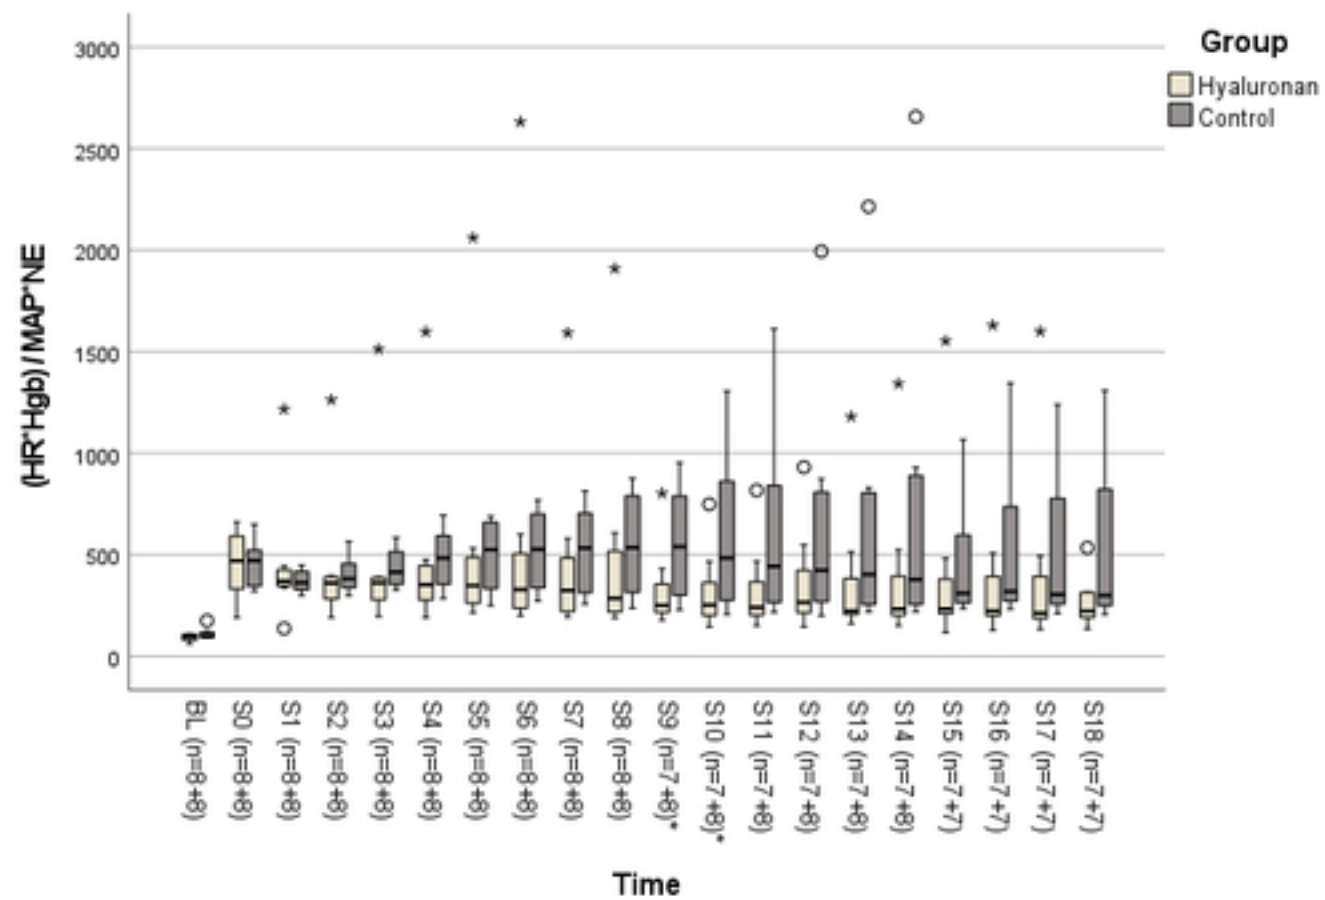

\* p<0.05 (0.049 and 0.049)

Figure 3c

Figure

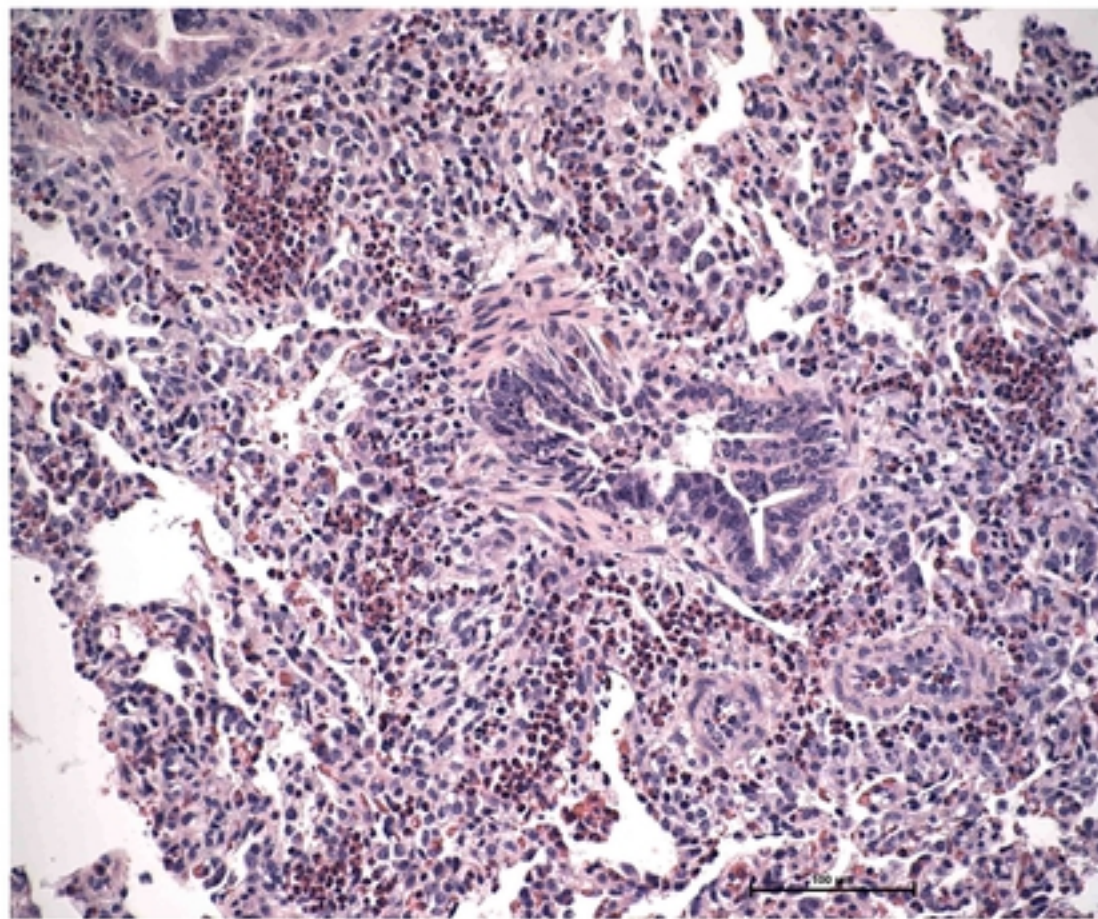

Figure 4b. Lung. Control group.



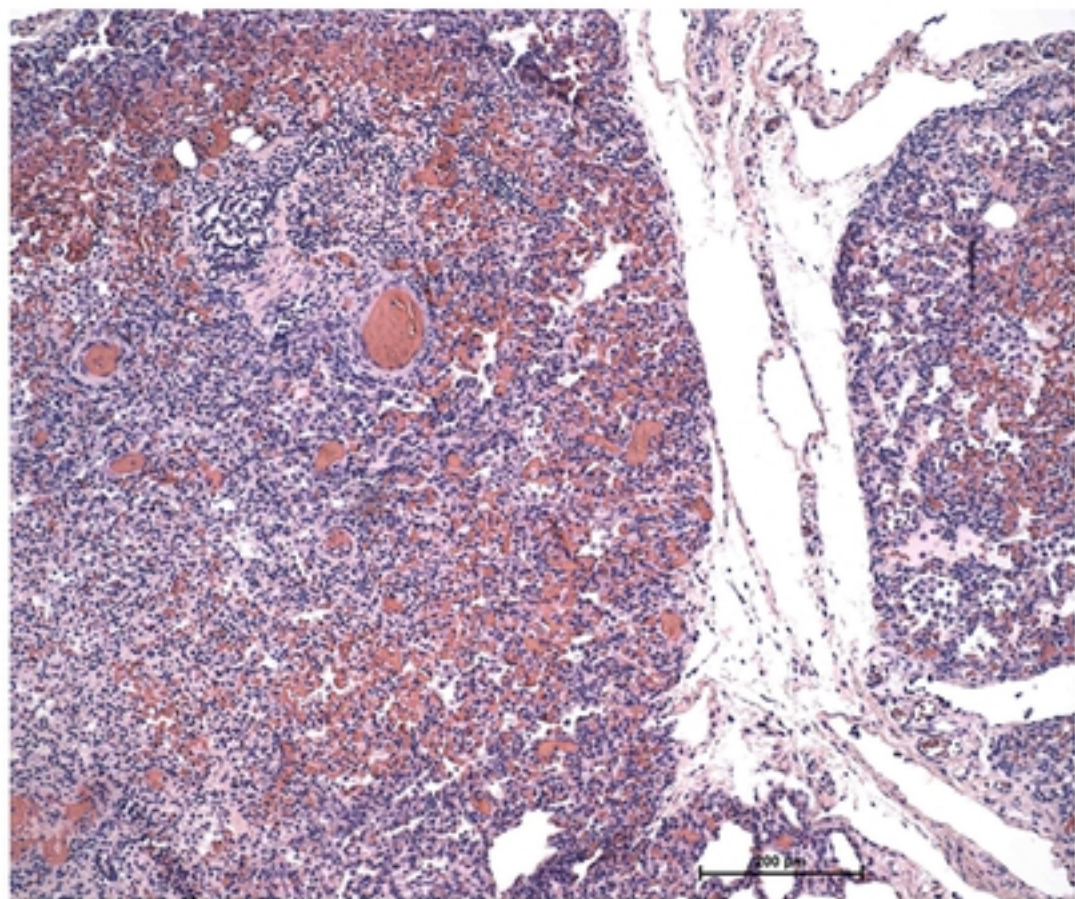

Figure 4a. Lung Intervention group

Figure



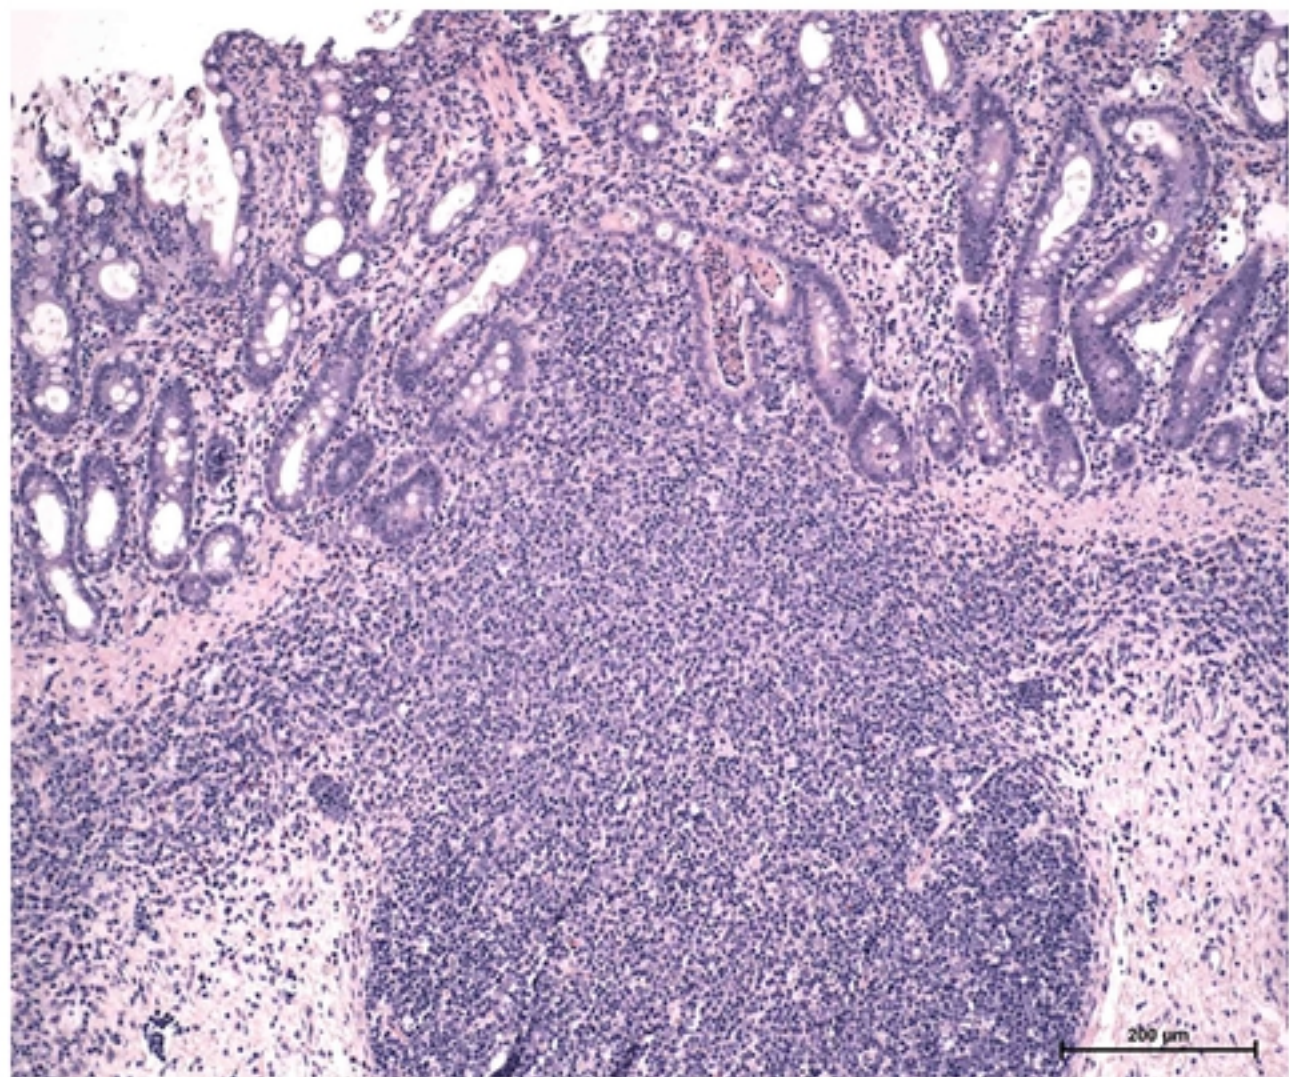

Figure 5a. Intervention group. Intestine.

Figure



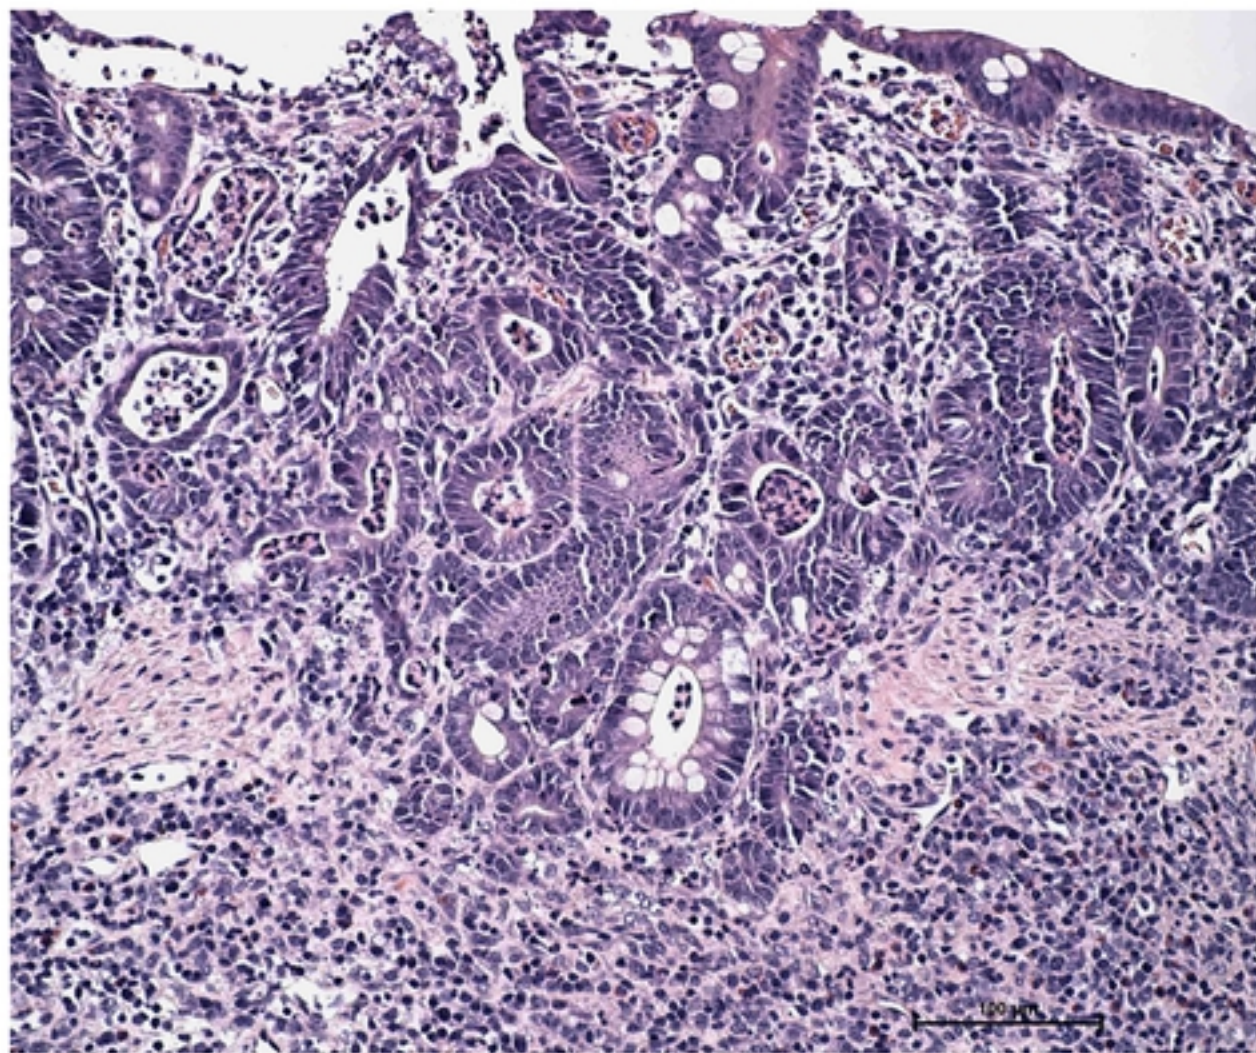

Figure 5b. Control group. Intestine.

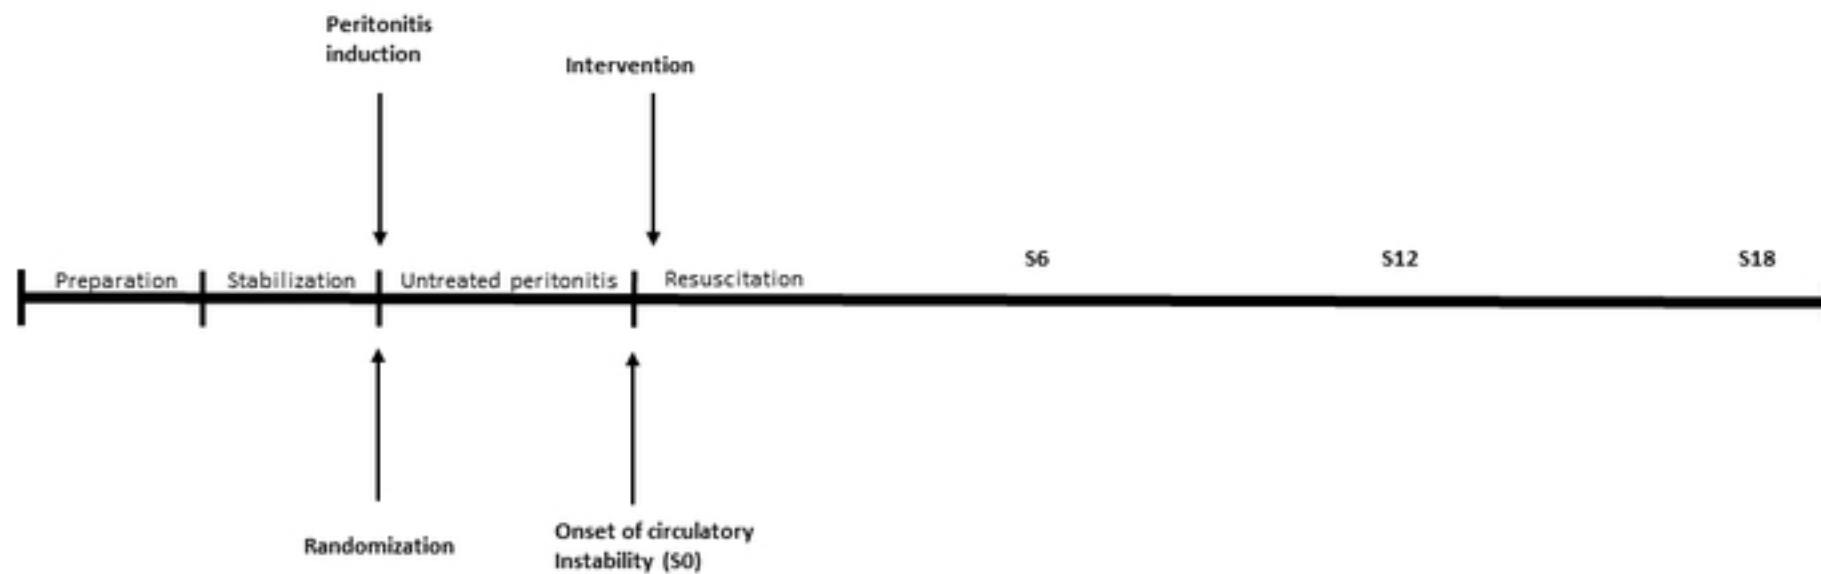

Figure 1

Figure
